# Supplementary material for: Luminescent 2-phenylbenzothiazole cyclometalated PtII and IrIII complexes with chelating P^O ligands
Source: Royal Society of Chemistry journal article supplement (doi:10.1039/d1dt03531b), 2021-11-26
Supplement: d1dt03531b1.pdf [file d1dt03531b1.pdf]

## Supporting Information

### Luminescent 2-phenylbenzothiazole cyclometalated Pt<sup>II</sup> and Ir<sup>III</sup> complexes with chelating P<sup>^</sup>O ligands

*David Gómez-de-Segura, Rebeca Lara, Mónica Martínez-Junquera, Elena Lalinde and M. Teresa Moreno\**

Departamento de Química-Centro de Síntesis Química de La Rioja, (CISQ), Universidad de La Rioja, 26006, Logroño, Spain. E-mail: [teresa.moreno@unirioja.es](mailto:teresa.moreno@unirioja.es)

| <b>Contents:</b>                                                      | <b>Page</b> |
|-----------------------------------------------------------------------|-------------|
| <b>1.- Characterization of Complexes.....</b>                         | <b>S2</b>   |
| <b>1.1.- NMR Spectra.....</b>                                         | <b>S2</b>   |
| <b>1.2.- Crystal Structures .....</b>                                 | <b>S9</b>   |
| <b>2.- Photophysical Properties and Theoretical Calculations.....</b> | <b>S14</b>  |

## 1.- Characterization of Complexes

### 1.1- NMR Spectra

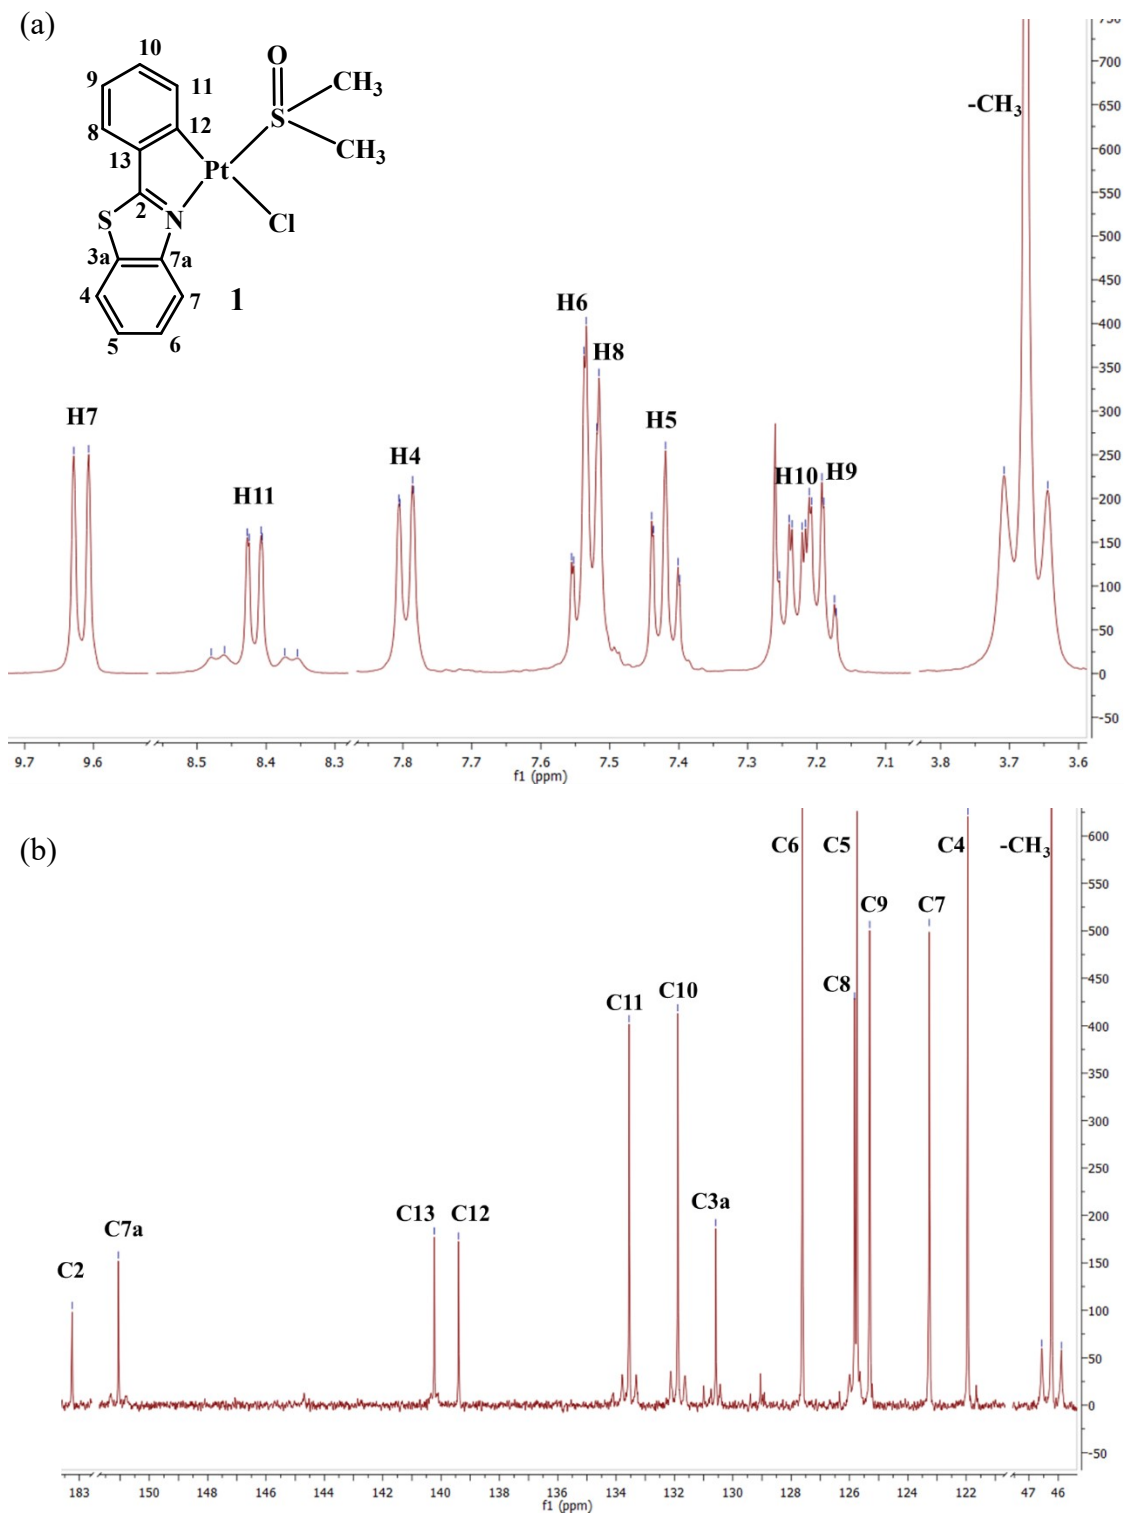

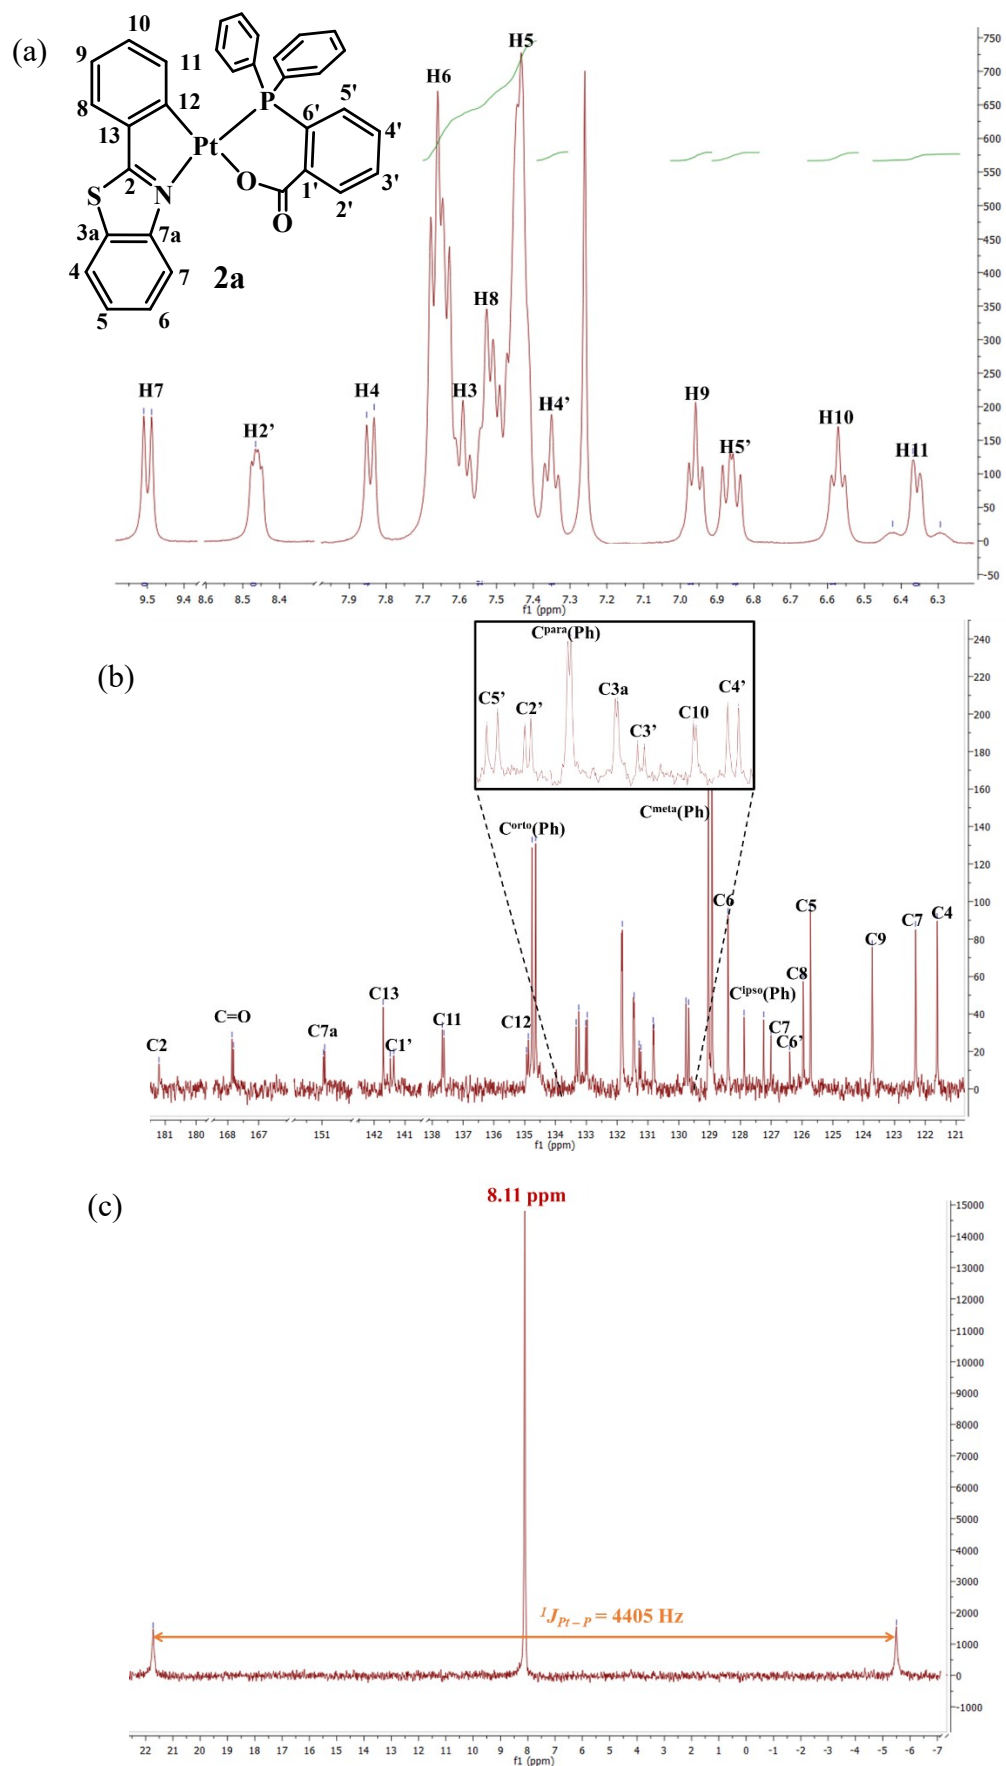

**Fig. S2** NMR spectra of **2a** in  $\text{CDCl}_3$  at 298 K (a)  $^1\text{H}$ , (b)  $^{13}\text{C}\{^1\text{H}\}$ , (c)  $^{31}\text{P}\{^1\text{H}\}$

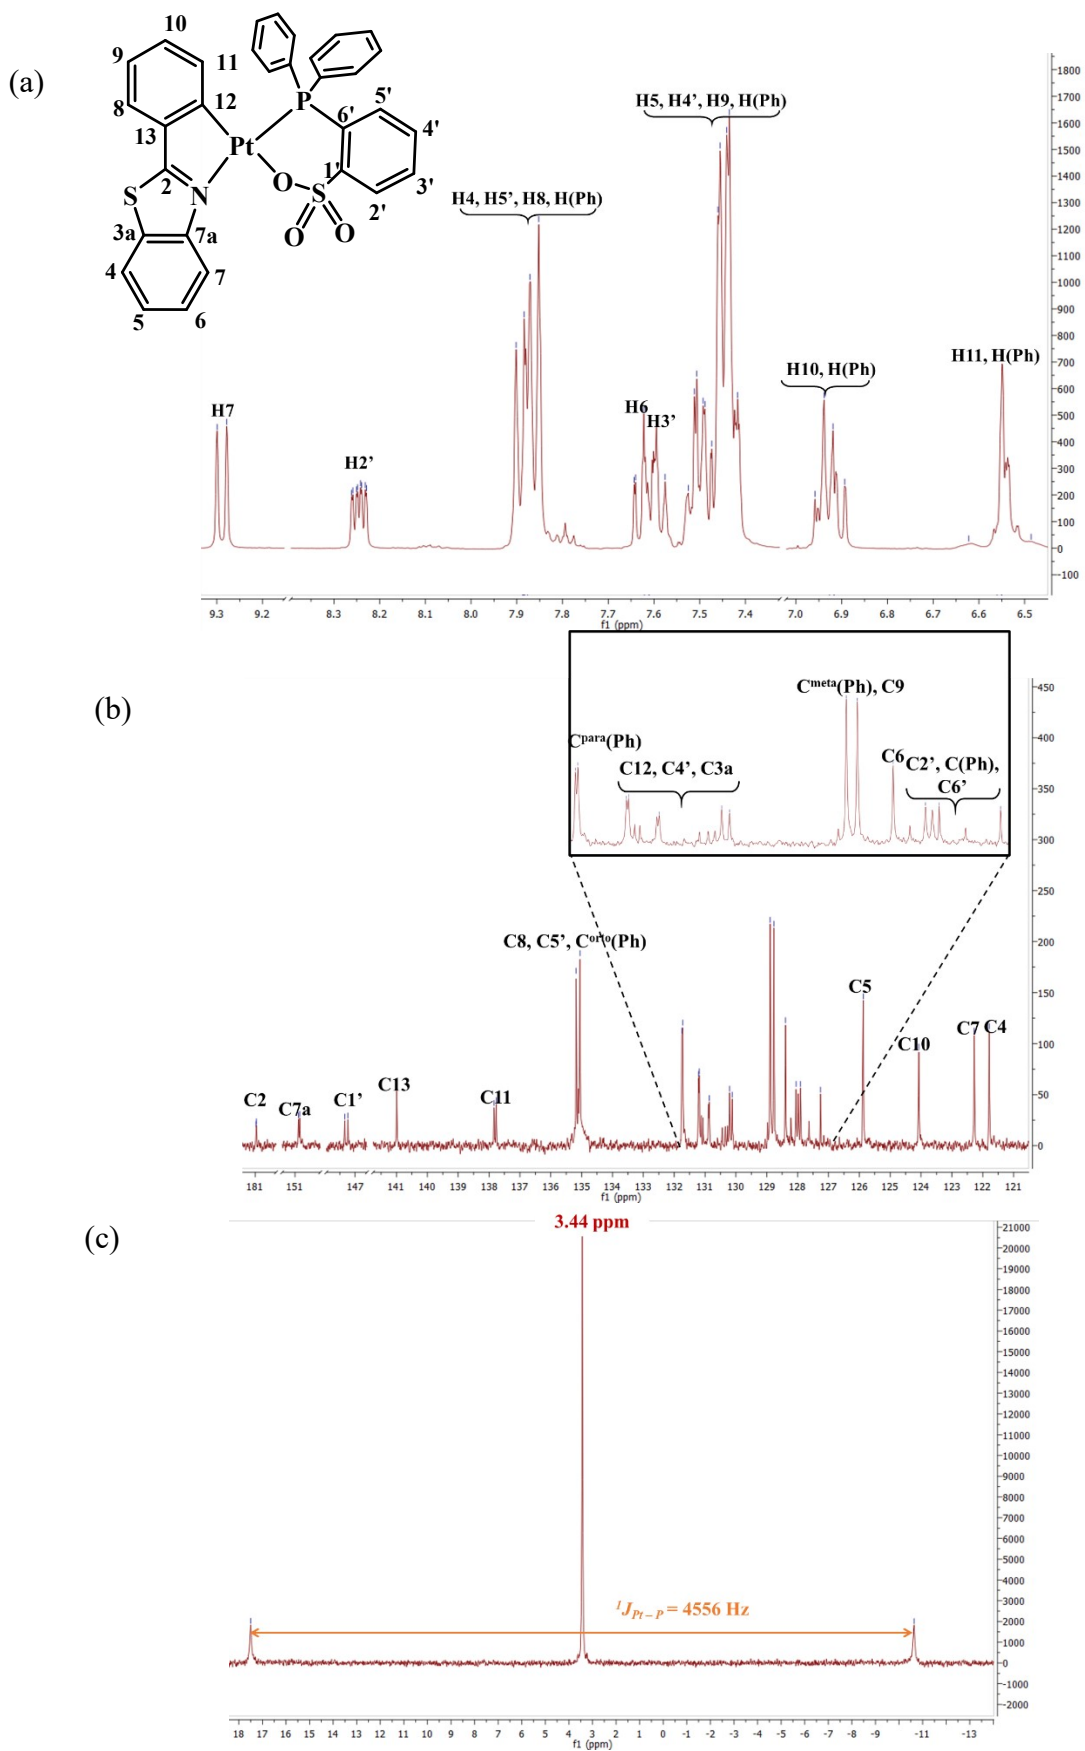

Fig. S3 NMR spectra of **2b** in  $\text{CDCl}_3$  at 298 K (a)  $^1\text{H}$ , (b)  $^{13}\text{C}\{^1\text{H}\}$ , (c)  $^{31}\text{P}\{^1\text{H}\}$

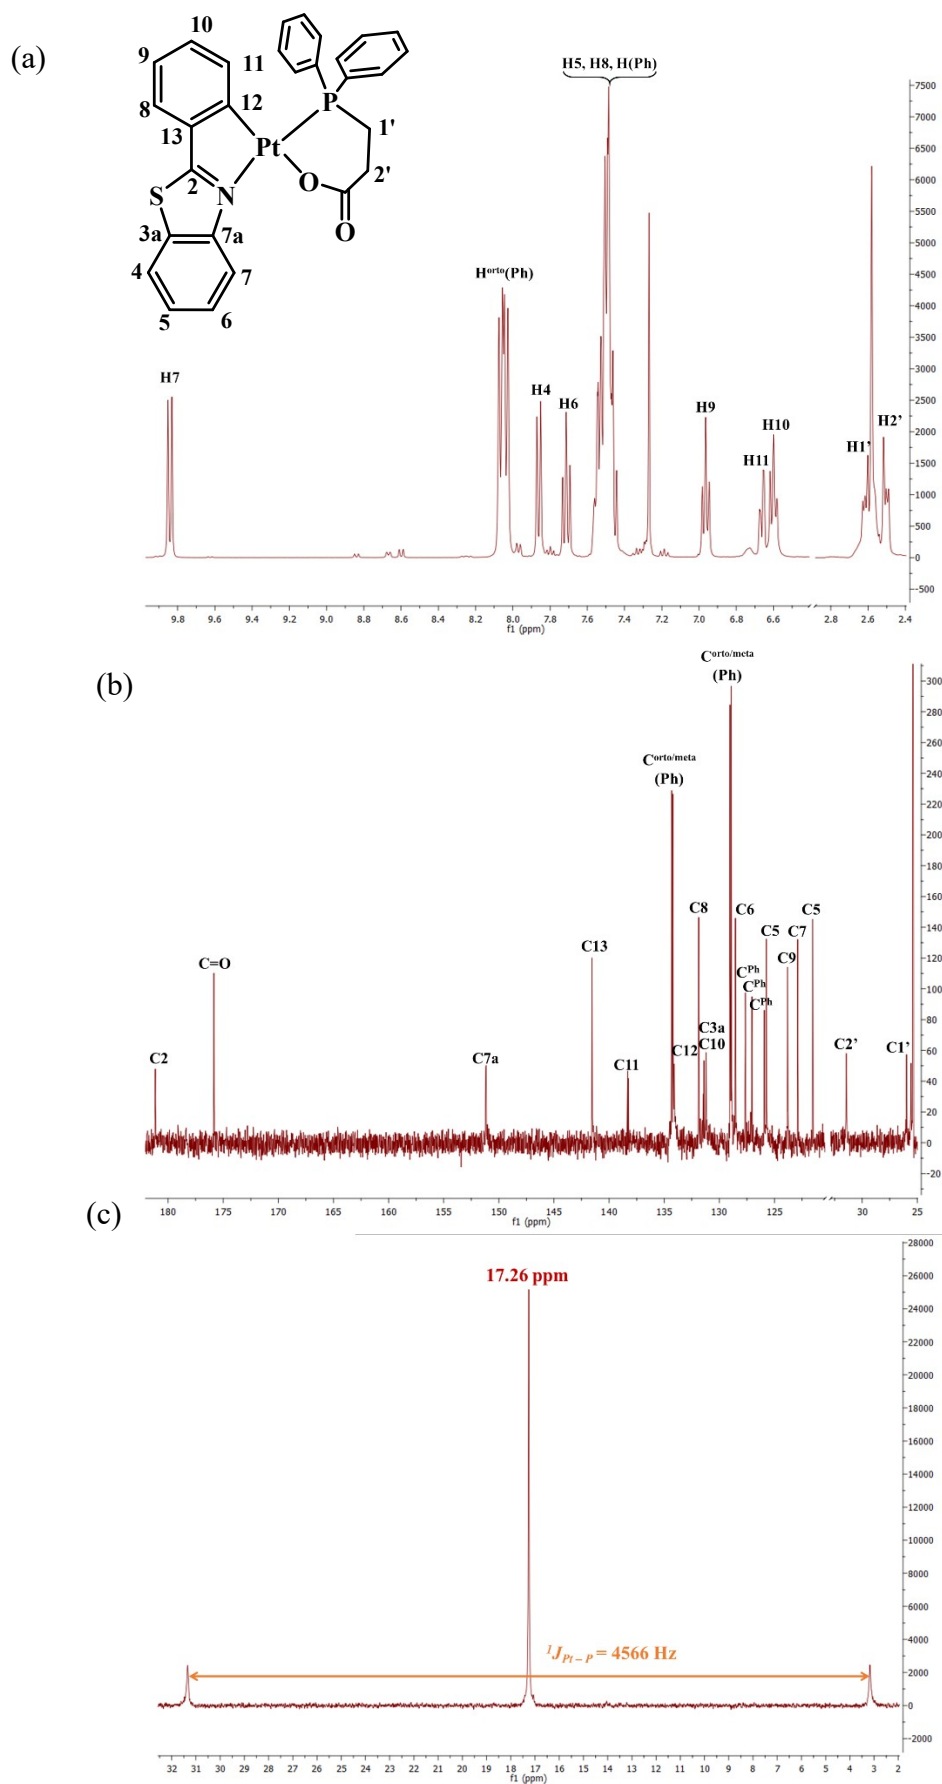

**Fig. S4** NMR spectra of **2c** in  $\text{CDCl}_3$  at 298 K (a)  $^1\text{H}$ , (b)  $^{13}\text{C}\{^1\text{H}\}$ , (c)  $^{31}\text{P}\{^1\text{H}\}$

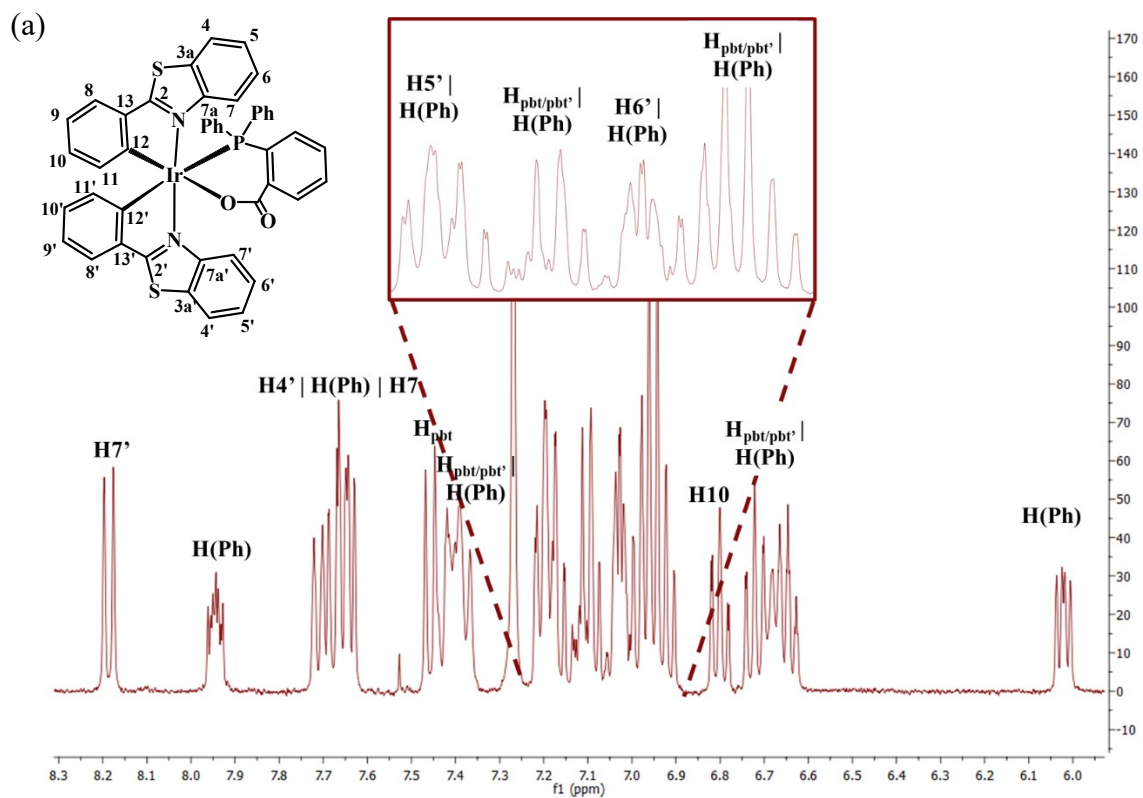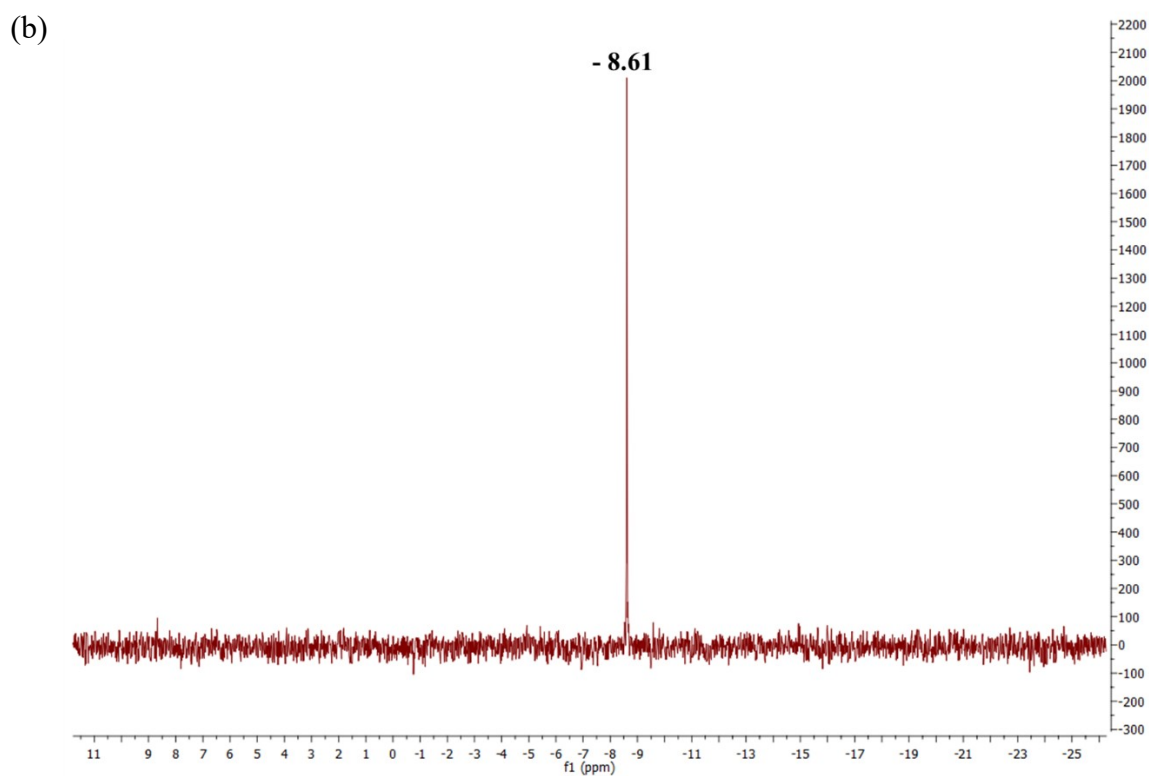

**Fig. S5** NMR spectra of **3a** in  $\text{CDCl}_3$  at 298 K (a)  $^1\text{H}$ , (b)  $^{31}\text{P}\{^1\text{H}\}$

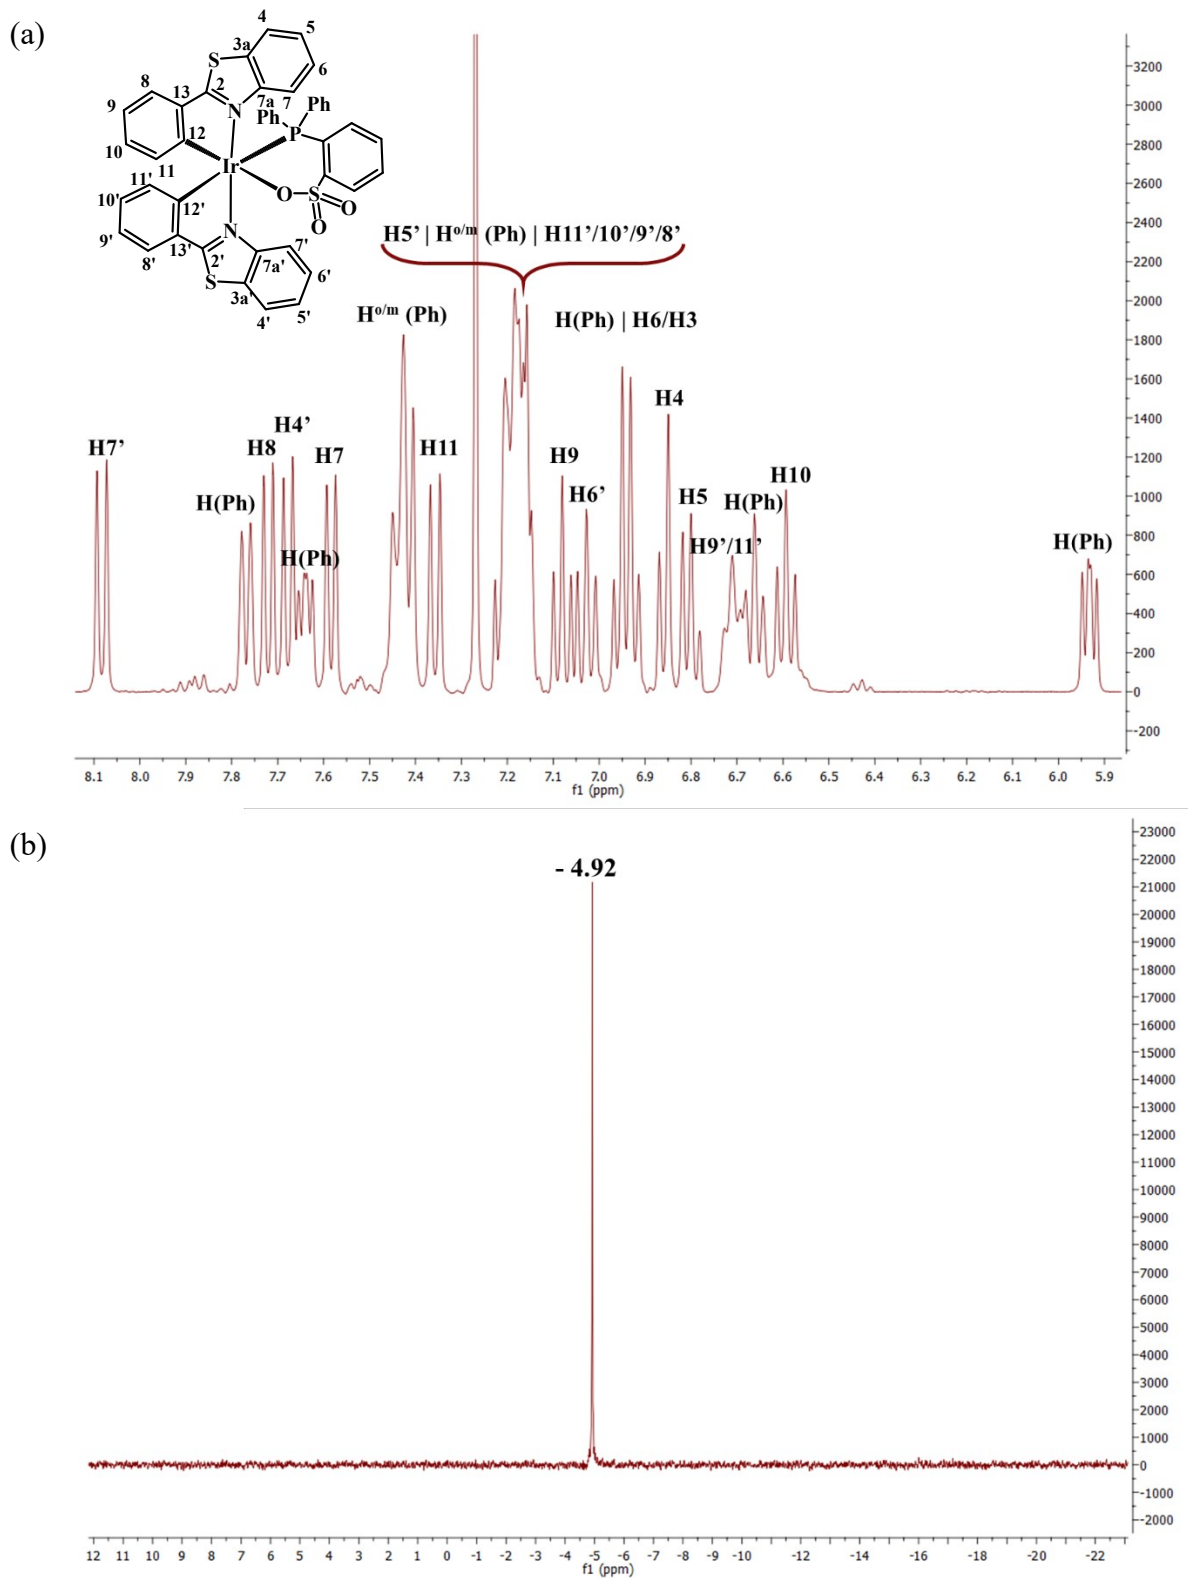

**Fig. S6** NMR spectra of **3b** in  $\text{CDCl}_3$  at 298 K (a)  $^1\text{H}$ , (b)  $^{31}\text{P}\{^1\text{H}\}$

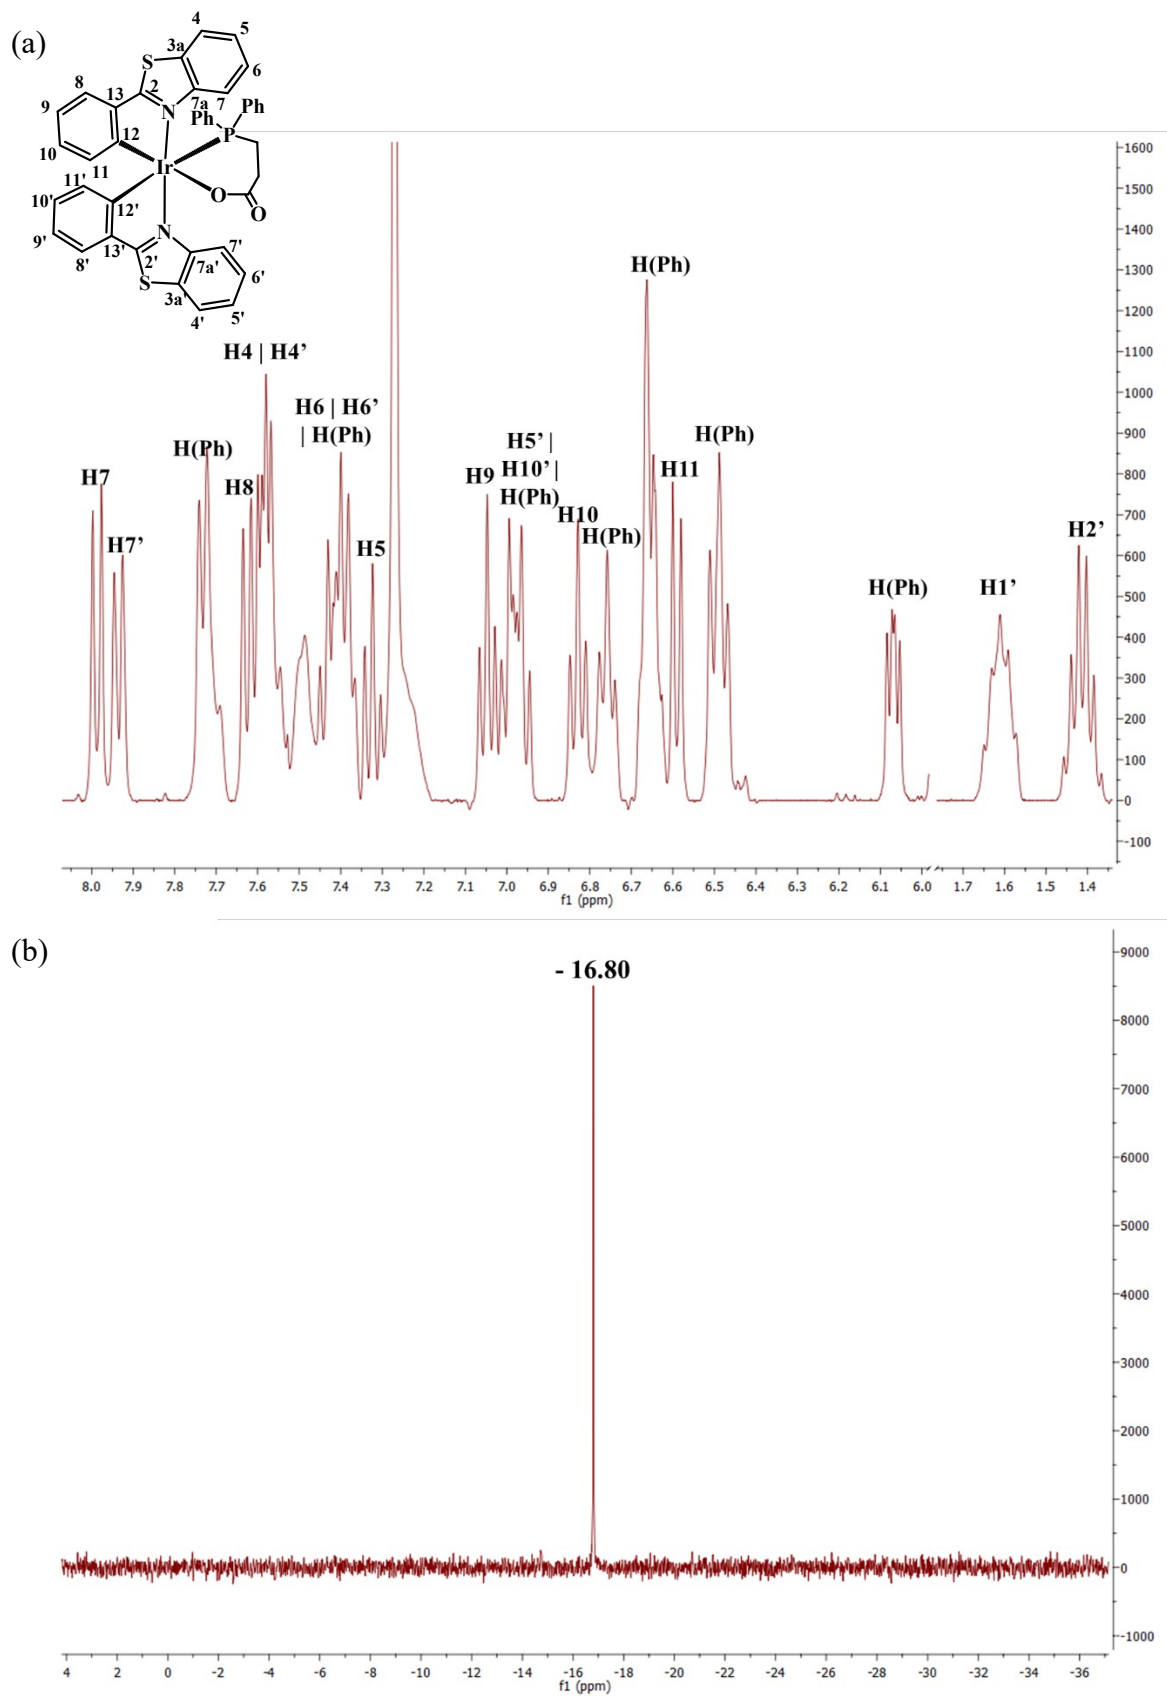

**Fig. S7** NMR spectra of **3c** in  $\text{CDCl}_3$  at 298 K (a)  $^1\text{H}$ , (b)  $^{31}\text{P}\{^1\text{H}\}$



## 1.2.- Crystal Structures

**Table S1.** X-ray crystallographic data for complexes **1**, **2a**·H<sub>2</sub>O and **2b**·0.5 CHCl<sub>3</sub>.

|                                                                                                 | <b>1</b>                                             | <b>2a</b> ·H <sub>2</sub> O                          | <b>2b</b> ·0.5 CHCl <sub>3</sub>                                                        |
|-------------------------------------------------------------------------------------------------|------------------------------------------------------|------------------------------------------------------|-----------------------------------------------------------------------------------------|
| <b>Empirical formula</b>                                                                        | C <sub>15</sub> H <sub>14</sub> CINOPtS <sub>2</sub> | C <sub>32</sub> H <sub>24</sub> NO <sub>3</sub> PPtS | C <sub>31.5</sub> H <sub>22.5</sub> Cl <sub>1.5</sub> NO <sub>3</sub> PPtS <sub>2</sub> |
| <b>Molecular weight</b>                                                                         | 518.93                                               | 728.63                                               | 806.36                                                                                  |
| <b>T (K)</b>                                                                                    | 295(2)                                               | 145(1)                                               | 100(1)                                                                                  |
| <b>Wavelength (Å)</b>                                                                           | 0.71076                                              | 0.71076                                              | 0.71076                                                                                 |
| <b>Crystal system</b>                                                                           | Orthorhombic                                         | Triclinic                                            | Monoclinic                                                                              |
| <b>Space group</b>                                                                              | P2 <sub>1</sub> 2 <sub>1</sub> 2 <sub>1</sub>        | P-1                                                  | P 2 <sub>1</sub> /n                                                                     |
| <b>Crystal size (mm)</b>                                                                        | 0.324x0.232x0.166                                    | 0.220x0.160x0.158                                    | 0.183x0.163x0.070                                                                       |
| <b>a (Å)</b>                                                                                    | 5.9444(6)                                            | 9.5339(8)                                            | 9.4693(7)                                                                               |
| <b>b (Å)</b>                                                                                    | 10.8982(10)                                          | 11.7090(11)                                          | 21.7025(15)                                                                             |
| <b>c (Å)</b>                                                                                    | 24.027(2)                                            | 13.0973(12)                                          | 14.0447(10)                                                                             |
| <b>α (°)</b>                                                                                    | 90.0                                                 | 82.876(3)                                            | 90.0                                                                                    |
| <b>β (°)</b>                                                                                    | 90.0                                                 | 72.589(3)                                            | 100.138(2)                                                                              |
| <b>γ (°)</b>                                                                                    | 90.0                                                 | 71.732(3)                                            | 90.0                                                                                    |
| <b>V (Å<sup>3</sup>)</b>                                                                        | 1556.5(3)                                            | 1324.0(2)                                            | 2841.2(4)                                                                               |
| <b>Z</b>                                                                                        | 4                                                    | 2                                                    | 4                                                                                       |
| <b>Density (calculated)<br/>(g/cm<sup>3</sup>)</b>                                              | 2.214                                                | 1.828                                                | 1.885                                                                                   |
| <b>Absorption<br/>coefficient (mm<sup>-1</sup>)</b>                                             | 9.451                                                | 5.474                                                | 5.319                                                                                   |
| <b>F(000)</b>                                                                                   | 984                                                  | 712                                                  | 1572                                                                                    |
| <b>θ range for data<br/>collection (°)</b>                                                      | 3.531 to 26.370                                      | 3.202 to 27.953                                      | 2.843 to 26.370                                                                         |
| <b>Index ranges</b>                                                                             | -7<=h<=7,<br>-13<=k<=13,<br>-30<=l<=30               | -12<=h<=12,<br>-15<=k<=15,<br>-17<=l<=17             | -11<=h<=11,<br>-27<=k<=27,<br>-17<=l<=17                                                |
| <b>Reflections collected</b>                                                                    | 85598                                                | 77991                                                | 140753                                                                                  |
| <b>Independent<br/>reflections</b>                                                              | 3185 [R(int) = 0.1219]                               | 6346 [R(int) = 0.0433]                               | 5801 [R(int) = 0.1179]                                                                  |
| <b>Data / restraints /<br/>parameters</b>                                                       | 3185 / 0 / 191                                       | 6346 / 0 / 360                                       | 5801 / 0 / 352                                                                          |
| <b>Goodness-of-fit on<br/>F<sup>2</sup>[a]</b>                                                  | 1.236                                                | 1.161                                                | 1.073                                                                                   |
| <b>Final R indices<br/>[I&gt;2σ(I)] [a]</b>                                                     | R1 = 0.0196, wR2 =<br>0.0548                         | R1 = 0.0147, wR2 =<br>0.0361                         | R1 = 0.0304, wR2 =<br>0.0716                                                            |
| <b>R indices (all data) [a]</b>                                                                 | R1 = 0.0197, wR2 =<br>0.0548                         | R1 = 0.0164, wR2 =<br>0.0366                         | R1 = 0.0448, wR2 =<br>0.0793                                                            |
| <b>Largest diff. peak<br/>and hole (e Å<sup>-3</sup>)<br/>(d<sub>min</sub>/d<sub>max</sub>)</b> | 0.898 and -1.525                                     | 0.398 and -1.428                                     | 1.460 and -2.291                                                                        |

[a]  $R1 = \Sigma(|F_o| - |F_c|) / \Sigma |F_o|$ ;  $wR2 = [\Sigma w(F_o^2 - F_c^2)^2 / \Sigma w F_o^2]^{1/2}$ ; goodness of fit =  $\{\Sigma [w(F_o^2 - F_c^2)^2] / (N_{obs} - N_{param})\}^{1/2}$ ;  $w = [\sigma^2(F_o) + (g_1 P)^2 + g_2 P]^{-1}$ ;  $P = [\max(F_o^2; 0 + 2F_c^2)]/3$ .

**Table S2.** X-ray crystallographic data for complexes **2c**·THF, **3a**·2.75CHCl<sub>3</sub> and **3b**·1.5CH<sub>3</sub>COCH<sub>3</sub>.

|                                                                                         | <b>2c</b> ·THF                                       | <b>3a</b> ·2.75CHCl <sub>3</sub>                                                                         | <b>3b</b> ·1.5CH <sub>3</sub> COCH <sub>3</sub>                                     |
|-----------------------------------------------------------------------------------------|------------------------------------------------------|----------------------------------------------------------------------------------------------------------|-------------------------------------------------------------------------------------|
| <b>Empirical formula</b>                                                                | C <sub>32</sub> H <sub>30</sub> NO <sub>3</sub> PPtS | C <sub>47.75</sub> H <sub>32.75</sub> Cl <sub>8.25</sub> IrN <sub>2</sub> O <sub>2</sub> PS <sub>2</sub> | C <sub>48.5</sub> H <sub>39</sub> IrN <sub>2</sub> O <sub>4.5</sub> PS <sub>3</sub> |
| <b>Molecular weight</b>                                                                 | 734.69                                               | 1246.26                                                                                                  | 1041.16                                                                             |
| <b>T (K)</b>                                                                            | 120(1)                                               | 173 (2)                                                                                                  | 100(1)                                                                              |
| <b>Wavelength (Å)</b>                                                                   | 0.71076                                              | 0.71076                                                                                                  | 0.71076                                                                             |
| <b>Crystal system</b>                                                                   | Monoclinic                                           | Monoclinic                                                                                               | Monoclinic                                                                          |
| <b>Space group</b>                                                                      | C c                                                  | P 2 <sub>1</sub> /c                                                                                      | P 2 <sub>1</sub> /n                                                                 |
| <b>Crystal size (mm)</b>                                                                | 0.294 x 0.190 x 0.149                                | 0.150 x 0.120 x 0.100                                                                                    | 0.277 x 0.149 x 0.133                                                               |
| <b>a (Å)</b>                                                                            | 9.0583(12)                                           | 18.8070(5)                                                                                               | 12.210(3)                                                                           |
| <b>b (Å)</b>                                                                            | 29.188(4)                                            | 14.4455(5)                                                                                               | 18.957(5)                                                                           |
| <b>c (Å)</b>                                                                            | 10.3424(14)                                          | 19.5948(5)                                                                                               | 18.462(6)                                                                           |
| <b>α (°)</b>                                                                            | 90                                                   | 90                                                                                                       | 90                                                                                  |
| <b>β (°)</b>                                                                            | 91.914(4)                                            | 117.317(2)                                                                                               | 96.050(12)                                                                          |
| <b>γ (°)</b>                                                                            | 90                                                   | 90                                                                                                       | 90                                                                                  |
| <b>V (Å<sup>3</sup>)</b>                                                                | 2732.9(6)                                            | 4729.8(3)                                                                                                | 4249(2)                                                                             |
| <b>Z</b>                                                                                | 4                                                    | 4                                                                                                        | 4                                                                                   |
| <b>Density (calculated) (g/cm<sup>3</sup>)</b>                                          | 1.786                                                | 1.750                                                                                                    | 1.627                                                                               |
| <b>Absorption coefficient (mm<sup>-1</sup>)</b>                                         | 5.305                                                | 3.454                                                                                                    | 3.377                                                                               |
| <b>F(000)</b>                                                                           | 1448                                                 | 2454                                                                                                     | 2080                                                                                |
| <b>θ range for data collection (°)</b>                                                  | 3.074 to 27.940                                      | 2.516 to 25.681                                                                                          | 2.848 to 27.918                                                                     |
| <b>Index ranges</b>                                                                     | -11<=h<=11,<br>-38<=k<=38,<br>-13<=l<=13             | -22<=h<=22,<br>-17<=k<=17,<br>-23<=l<=23                                                                 | -16<=h<=16,<br>-24<=k<=24,<br>-24<=l<=24                                            |
| <b>Reflections collected</b>                                                            | 85642                                                | 34520                                                                                                    | 99536                                                                               |
| <b>Independent reflections</b>                                                          | 6418 [R(int) = 0.0265]                               | 8879 [R(int) = 0.0664]                                                                                   | 10160 [R(int) = 0.0218]                                                             |
| <b>Data / restraints / parameters</b>                                                   | 6418 / 2 / 353                                       | 8879 / 0 / 550                                                                                           | 10160 / 0 / 524                                                                     |
| <b>Goodness-of-fit on F<sup>2</sup>[a]</b>                                              | 1.074                                                | 1.037                                                                                                    | 1.075                                                                               |
| <b>Final R indices [I&gt;2σ(I)] [a]</b>                                                 | R1 = 0.0155, wR2 = 0.0403                            | R1 = 0.0397, wR2 = 0.0935                                                                                | R1 = 0.0170, wR2 = 0.0405                                                           |
| <b>R indices (all data) [a]</b>                                                         | R1 = 0.0157, wR2 = 0.0404                            | R1 = 0.0550, wR2 = 0.1009                                                                                | R1 = 0.0190, wR2 = 0.0421                                                           |
| <b>Largest diff. peak and hole (e Å<sup>-3</sup>) (d<sub>min</sub>/d<sub>max</sub>)</b> | 1.125 and -0.961                                     | 1.353 and -1.501                                                                                         | 0.618 and -0.910                                                                    |

[a]  $R1 = \Sigma(|F_o| - |F_c|) / \Sigma |F_o|$ ;  $wR2 = [\Sigma w(F_o^2 - F_c^2)^2 / \Sigma wF_o^2]^{1/2}$ ; goodness of fit =  $\{\Sigma[w(F_o^2 - F_c^2)^2] / (N_{obs} - N_{param})\}^{1/2}$ ;  $w = [\sigma^2(F_o) + (g_1P)^2 + g_2P]^{-1}$ ;  $P = [\max(F_o^2, 0 + 2F_c^2)]/3$ .

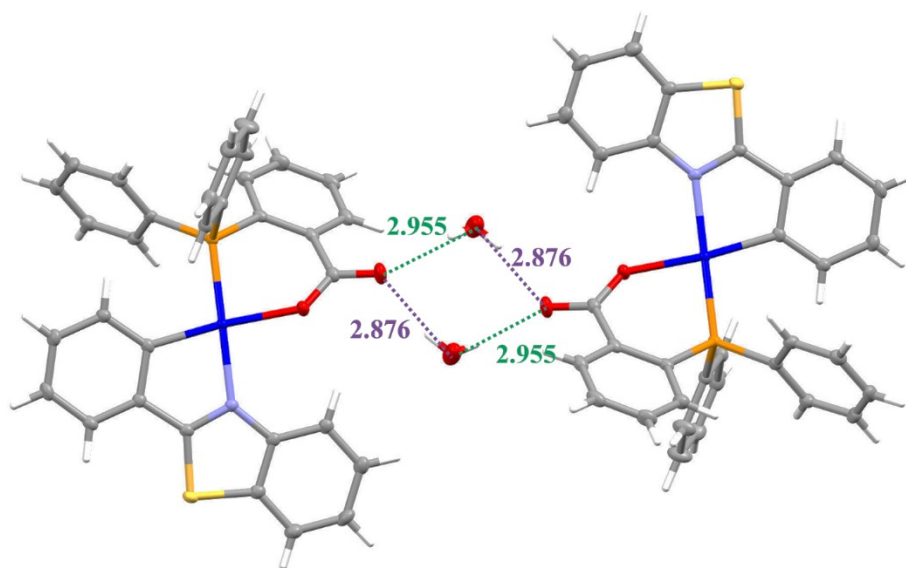

a)

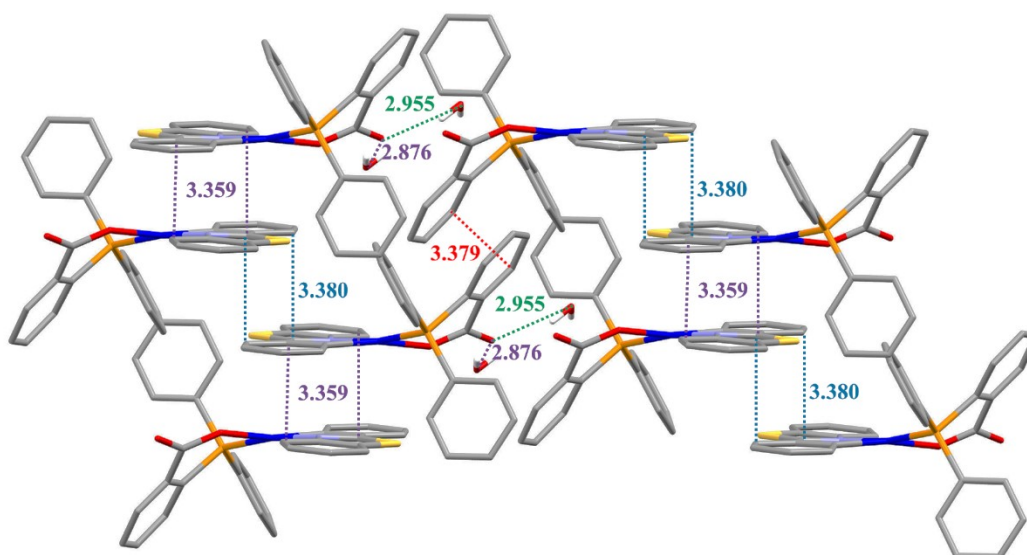

b)

**Fig. S8** a) Hydrogen bonds between two molecules of **2a** through the H<sub>2</sub>O crystallization molecules (2.876 and 2.955 Å) and b) crystal packing of **2a** ( $\pi \cdots \pi$  interactions: 3.359, 3.380 and 3.379 Å).

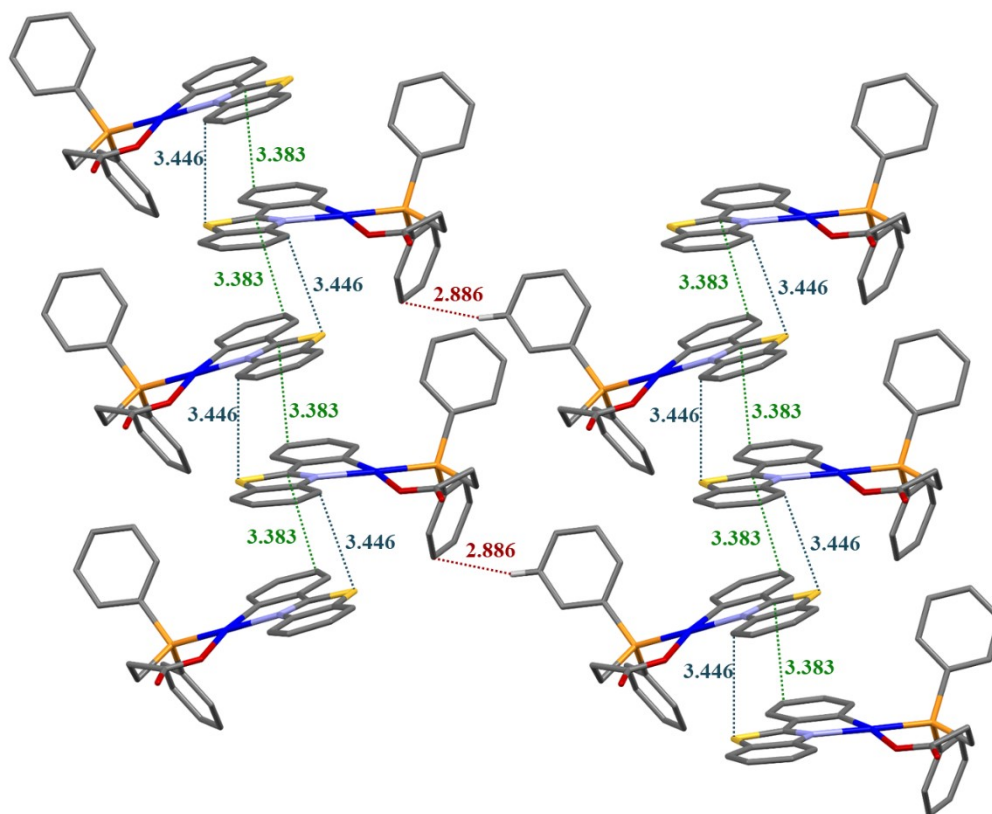

**Fig. S9** Crystal packing of **2c** showing a head-to-head columnar stacking through  $\pi \cdots \pi$  interactions (3.383 and 3.446 Å) attached by  $S \cdots H$  and  $C-H \cdots \pi$  interactions (red dots 2.886 Å).

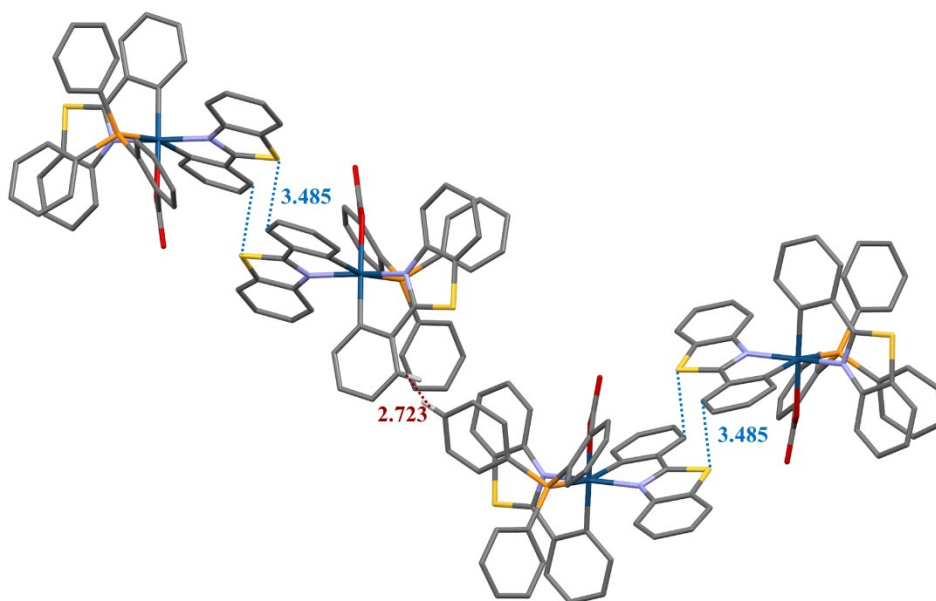

**Fig. S10** Crystal packing of **3a** showing dimers connected by S...C-H interactions (3.485 Å) and attached by C-H... $\pi$  interactions (2.723 Å) between the aryl of the phosphines.

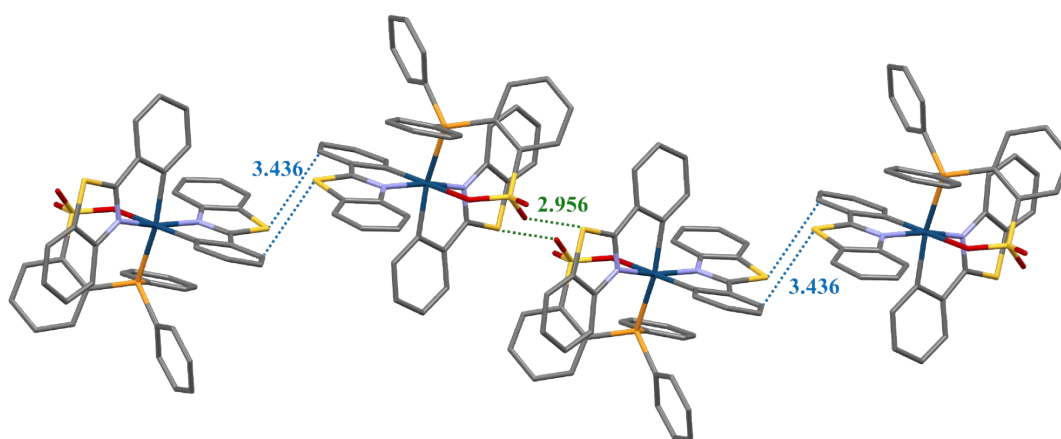

**Fig. S11** Crystal packing of **3b** showing dimers connected by S...C-H interactions (3.436 Å) and attached by S...O interactions (2.956 Å).

## 2.- Photophysical Properties and Theoretical Calculations

| <b>Table S3.</b> Absorption data for all compounds in CH <sub>2</sub> Cl <sub>2</sub> (5 x 10 <sup>-5</sup> M)                   |                                                                                                                                                                    |
|----------------------------------------------------------------------------------------------------------------------------------|--------------------------------------------------------------------------------------------------------------------------------------------------------------------|
| Compound                                                                                                                         | $\lambda_{\text{abs}}/\text{nm}$ ( $\epsilon \times 10^{-3}/\text{M}^{-1}\text{cm}^{-1}$ )                                                                         |
| [Pt(pbt)Cl(DMSO)]<br><b>1</b>                                                                                                    | 231 (25.97), 256 (20.91), 321 (16.75), 335 (16.45),<br>389 (5.90), 407 (4.77)                                                                                      |
| [Pt(pbt){PPh <sub>2</sub> ( <i>o</i> -C <sub>6</sub> H <sub>4</sub> COO)- $\kappa P, O$ }]<br><b>2a</b>                          | 235 (45.2), 258 (23.54), 320 (18.32), 334 (16.71), 395<br>(5.91), 414 (5.12)                                                                                       |
| [Pt(pbt){PPh <sub>2</sub> ( <i>o</i> -C <sub>6</sub> H <sub>4</sub> SO <sub>3</sub> )- $\kappa P, O$ }]<br><b>2b</b>             | 232 (43.43), 260 (21.06), 266 (19.86), 319 (16.25),<br>334 (15.85), 387 (6.42), 407 (5.03)                                                                         |
| [Pt(pbt){PPh <sub>2</sub> (CH <sub>2</sub> CH <sub>2</sub> CO <sub>2</sub> )- $\kappa P, O$ }]<br><b>2c</b>                      | 230 (25.98), 261 (13.20), 268 (14.30), 280 <sub>h</sub> (10.81),<br>320 (11.50), 333 (11.0), 393 (3.65), 412 (3.10)                                                |
| [Ir(pbt) <sub>2</sub> {PPh <sub>2</sub> ( <i>o</i> -C <sub>6</sub> H <sub>4</sub> CO <sub>2</sub> )- $\kappa PO$ }]<br><b>3a</b> | 235 (65.6), 240 (51.3), 248 (43.1), 258 <sub>h</sub> (36.4), 312 <sub>sh</sub><br>(23.0), 323 (25.3), 346 <sub>sh</sub> (12.7), 380 (7.2), 425 (6.8),<br>448 (4.9) |
| [Ir(pbt) <sub>2</sub> {PPh <sub>2</sub> ( <i>o</i> -C <sub>6</sub> H <sub>4</sub> SO <sub>3</sub> )- $\kappa PO$ }]<br><b>3b</b> | 233 (62.7), 249 <sub>sh</sub> (44.7), 279 <sub>sh</sub> (26.7), 313 <sub>sh</sub> (27.7), 323<br>(30.4), 375 (8.5), 417 (7.8), 441 (5.2)                           |
| [Ir(pbt) <sub>2</sub> {PPh <sub>2</sub> (CH <sub>2</sub> CH <sub>2</sub> CO <sub>2</sub> )- $\kappa PO$ }]<br><b>3c</b>          | 233 (34.3), 258 <sub>sh</sub> (18.2), 311 (15.5), 322 (17.4), 377<br>(4.4), 406 (4.3), 429 (3.3)                                                                   |

**Table S4.** DFT optimized geometries for ground state and triplet state (in CH<sub>2</sub>Cl<sub>2</sub>) for **1**, **2a**, **2b**, **2c** and **3a**.

| <b>1</b>         |            |                |                |
|------------------|------------|----------------|----------------|
|                  | X-ray      | S <sub>0</sub> | T <sub>1</sub> |
| Pt(1) - C(1)     | 2.031(7)   | 2.02664        | 2.00597        |
| Pt(1) - N(1)     | 2.087(6)   | 2.11333        | 2.06379        |
| Pt(1) - S(2)     | 2.2201(17) | 2.33572        | 2.36350        |
| Pt(1) - Cl(1)    | 2.3851(19) | 2.54382        | 2.55149        |
| C(1)-Pt(1)-N(1)  | 80.4(3)    | 80.24179       | 81.53280       |
| N(1)-Pt(1)-Cl(1) | 93.89(17)  | 97.80613       | 96.88093       |
| Cl(1)-Pt(1)-S(2) | 87.63(7)   | 84.67648       | 84.23069       |
| S(2)-Pt(1)-C(1)  | 97.2(2)    | 97.76147       | 97.62065       |

  

| <b>2a</b>       |            |                |                |
|-----------------|------------|----------------|----------------|
|                 | X-ray      | S <sub>0</sub> | T <sub>1</sub> |
| Pt(1) - N(1)    | 2.1058(15) | 2.15416        | 2.10705        |
| Pt(1) - P(1)    | 2.2073(5)  | 2.27194        | 2.29072        |
| Pt(1) - C(1)    | 2.0074(19) | 2.01983        | 1.99307        |
| Pt(1) - O(1)    | 2.1071(14) | 2.14871        | 2.15922        |
| C(1)-Pt(1)-N(1) | 80.59(7)   | 79.87459       | 81.39307       |
| P(1)-Pt(1)-O(1) | 86.03(4)   | 82.11212       | 81.03841       |
| C(1)-Pt(1)-P(1) | 100.03(6)  | 100.94389      | 103.79424      |
| O(1)-Pt(1)-N(1) | 94.36(6)   | 94.65041       | 94.39409       |

  

| <b>2b</b>       |            |                |                |
|-----------------|------------|----------------|----------------|
|                 | X-ray      | S <sub>0</sub> | T <sub>1</sub> |
| Pt(1) - C(1)    | 2.001(5)   | 2.01993        | 1.99575        |
| Pt(1) - N(1)    | 2.100(3)   | 2.15360        | 2.10942        |
| Pt(1) - O(1)    | 2.140(3)   | 2.19704        | 2.19942        |
| Pt(1) - P(1)    | 2.2286(11) | 2.30235        | 2.32291        |
| C(1)-Pt(1)-N(1) | 81.19(16)  | 80.31246       | 81.86451       |
| N(1)-Pt(1)-O(1) | 90.53(13)  | 91.77995       | 91.18401       |
| O(1)-Pt(1)-P(1) | 91.29(9)   | 90.14244       | 89.50541       |
| P(1)-Pt(1)-C(1) | 97.39(13)  | 97.80250       | 97.51585       |

  

| <b>2c</b>       |           |                |                |
|-----------------|-----------|----------------|----------------|
|                 | X-ray     | S <sub>0</sub> | T <sub>1</sub> |
| Pt(1)-C(1)      | 2.002(4)  | 2.01891        | 1.99220        |
| Pt(1)-O(1)      | 2.090(3)  | 2.15668        | 2.16105        |
| Pt(1)-N(1)      | 2.115(3)  | 2.16521        | 2.11988        |
| Pt(1)-P(1)      | 2.2028(9) | 2.27166        | 2.29074        |
| C(1)-Pt(1)-N(1) | 81.26(15) | 80.25545       | 81.88908       |
| O(1)-Pt(1)-N(1) | 90.13(13) | 91.48986       | 90.73013       |
| C(1)-Pt(1)-P(1) | 96.13(12) | 98.54182       | 98.31041       |
| O(1)-Pt(1)-P(1) | 92.48(8)  | 89.71482       | 89.06868       |

## 3a

|                   | X-ray      | S <sub>0</sub> | T <sub>1</sub> |
|-------------------|------------|----------------|----------------|
| Ir(1)-C(13)       | 1.996(5)   | 2.01348        | 2.01905        |
| Ir(1)-C(26)       | 2.055(5)   | 2.04818        | 2.03723        |
| Ir(1)-P(1)        | 2.3884(14) | 2.48790        | 2.50844        |
| Ir(1)-O(2)        | 2.240(3)   | 2.22488        | 2.22228        |
| Ir(1)-N(1)        | 2.065(4)   | 2.09095        | 2.10966        |
| Ir(1)-N(2)        | 2.093(4)   | 2.12516        | 2.05118        |
| C(45)-O(1)        | 1.318(6)   | 1.23806        | 1.23715        |
| C(45)-O(2)        | 1.235(6)   | 1.29330        | 1.29427        |
| C(13)-Ir(1)-P(1)  | 98.96(15)  | 104.10542      | 103.97608      |
| C(13)-Ir(1)-C(26) | 93.7(2)    | 92.79224       | 92.27038       |
| C(13)-Ir(1)-N(1)  | 80.35(19)  | 79.79842       | 79.62151       |
| C(13)-Ir(1)-N(2)  | 95.33(19)  | 95.10615       | 95.64981       |
| C(26)-Ir(1)-O(2)  | 88.50(17)  | 88.06409       | 88.57991       |
| C(26)-Ir(1)-N(1)  | 89.94(18)  | 91.08715       | 91.27885       |
| C(26)-Ir(1)-N(2)  | 79.62(18)  | 79.16154       | 80.81114       |
| N(1)-Ir(1)-O(2)   | 100.01(15) | 96.16960       | 95.77632       |
| N(1)-Ir(1)-P(1)   | 88.70(12)  | 90.42054       | 90.02680       |
| N(2)-Ir(1)-O(2)   | 84.72(1)   | 89.0040        | 89.01463       |
| N(2)-Ir(1)-P(1)   | 102.58(12) | 100.50186      | 98.95958       |
| O(2)-Ir(1)-P(1)   | 78.90(10)  | 74.97205       | 75.09070       |



**Table S5.** Selected vertical excitation energies singlets ( $S_0$ ) and first triplets computed by TD-DFT/SCRF ( $\text{CH}_2\text{Cl}_2$ ) with the orbitals involved for **1**, **2a**, **2b**, **2c** and **3a**

|                | State             | $\lambda/\text{nm}$ | $f$                                           | Transition (% Contribution)                         |
|----------------|-------------------|---------------------|-----------------------------------------------|-----------------------------------------------------|
| <b>1</b>       | T <sub>1</sub>    | 493,31235           |                                               | H-1→LUMO (16%), HOMO→LUMO (77%)                     |
|                | T <sub>2</sub>    | 412,52434           |                                               | HOMO→L+1 (75%)                                      |
|                | T <sub>3</sub>    | 401,63327           |                                               | H-1→LUMO (65%), HOMO→LUMO (17%)                     |
|                | S <sub>1</sub>    | <b>392,81498</b>    | <b>0,113</b>                                  | <b>HOMO→LUMO (95%)</b>                              |
|                | S <sub>2</sub>    | 361,28035           | 0,0021                                        | HOMO→L+1 (85%)                                      |
|                | S <sub>3</sub>    | 344,87953           | 0,0113                                        | H-2→LUMO (61%), H-1→LUMO (21%)                      |
|                | S <sub>4</sub>    | 334,22523           | 0,002                                         | H-2→LUMO (12%), H-2→L+1 (63%)                       |
|                | S <sub>5</sub>    | <b>324,87211</b>    | <b>0,2642</b>                                 | <b>H-1→LUMO (70%)</b>                               |
| S <sub>6</sub> | <b>315,00049</b>  | <b>0,1359</b>       | <b>H-3→LUMO (82%)</b>                         |                                                     |
| S <sub>7</sub> | 302,21619         | 0,0028              | H-3→L+1 (15%), H-1→L+1 (61%)                  |                                                     |
| <b>2a</b>      | T <sub>1</sub>    | 493,09313           |                                               | HOMO → LUMO (77%)                                   |
|                | T <sub>2</sub>    | 399,43085           |                                               | H-2→LUMO (21%), H-1→LUMO (48%), HOMO→LUMO (18%)     |
|                | T <sub>3</sub>    | 373,21895           |                                               | HOMO→L+1 (55%)                                      |
|                | S <sub>1</sub>    | <b>393,98562</b>    | <b>0,1298</b>                                 | <b>HOMO→LUMO (96%)</b>                              |
|                | S <sub>2</sub>    | 351,55623           | 0,0115                                        | H-2→LUMO (43%), H-1→LUMO (51%)                      |
|                | S <sub>3</sub>    | 340,90389           | 0,0066                                        | HOMO→L+1 (72%)                                      |
|                | S <sub>4</sub>    | <b>325,77470</b>    | <b>0,1798</b>                                 | <b>H-2→LUMO (47%), H-1→LUMO (39%),</b>              |
|                | S <sub>5</sub>    | 317,00374           | 0,0216                                        | H-2→L+1 (36%), H-1→L+1 (32%)                        |
| S <sub>6</sub> | <b>312,03336</b>  | <b>0,1428</b>       | <b>H-3→LUMO (80%)</b>                         |                                                     |
| S <sub>7</sub> | 308,47764         | 0,0786              | H-4→LUMO (66%)                                |                                                     |
| <b>2b</b>      | T <sub>1</sub>    | 490,87098           |                                               | H-2→LUMO (11%), HOMO→LUMO (81%)                     |
|                | T <sub>2</sub>    | 391,66095           |                                               | H-2→LUMO (78%), HOMO→LUMO (13%)                     |
|                | T <sub>3</sub>    | 375,32297           |                                               | HOMO→L+1 (31%), HOMO→L+2 (24%), HOMO→L+3 (10%)      |
|                | S <sub>1</sub>    | <b>386,48439</b>    | <b>0,1531</b>                                 | <b>HOMO→LUMO (95%)</b>                              |
|                | S <sub>2</sub>    | 349,62549           | 0,008                                         | H-1→LUMO (94%)                                      |
|                | S <sub>3</sub>    | 336,54775           | 0,0012                                        | HOMO→L+1 (46%), HOMO→L+2 (25%)                      |
|                | S <sub>4</sub>    | 321,47741           | 0,0718                                        | H-2→LUMO (43%), H-1→L+1 (22%), H-1→L+2 (16%)        |
|                | S <sub>5</sub>    | <b>318,14475</b>    | <b>0,1751</b>                                 | <b>H-2→LUMO (48%), H-1→L+1 (20%), H-1→L+2 (13%)</b> |
| S <sub>6</sub> | <b>312,12978</b>  | <b>0,1488</b>       | <b>H-3→LUMO (94%)</b>                         |                                                     |
| S <sub>7</sub> | 296,28684         | 0,0322              | HOMO→L+1 (46%), HOMO→L+2 (39%)                |                                                     |
| <b>2c</b>      | T <sub>1</sub>    | 493,882222          | -                                             | H-1->LUMO (14%), HOMO->LUMO (73%)                   |
|                | T <sub>2</sub>    | 400,646911          | -                                             | H-2->LUMO (31%), H-1->LUMO (35%), HOMO->LUMO (21%)  |
|                | T <sub>3</sub>    | 367,175624          | -                                             | H-4->LUMO (78%)                                     |
|                | S <sub>1</sub>    | <b>397,665639</b>   | <b>0,1224</b>                                 | <b>HOMO-&gt;LUMO (97%)</b>                          |
|                | S <sub>2</sub>    | 346,663478          | 0,0084                                        | H-3->LUMO (90%)                                     |
|                | S <sub>3</sub>    | <b>327,325078</b>   | <b>0,1481</b>                                 | <b>H-1-&gt;LUMO (85%)</b>                           |
|                | S <sub>4</sub>    | 323,913037          | 0,0119                                        | HOMO->L+1 (39%), HOMO->L+2 (34%)                    |
|                | S <sub>5</sub>    | 319,736424          | 0,0454                                        | H-2->LUMO (87%)                                     |
| S <sub>6</sub> | <b>311,690364</b> | <b>0,1538</b>       | <b>H-5-&gt;LUMO (11%), H-4-&gt;LUMO (82%)</b> |                                                     |
| S <sub>7</sub> | 308,8871          | 0,0362              | H-5->LUMO (81%), H-4->LUMO (13%)              |                                                     |
| <b>3a</b>      | T <sub>1</sub>    | 497,149818          | -                                             | H-2->L+1 (11%), H-1->L+1 (11%), HOMO->LUMO (12%),   |

|                      |                   |               |                                                                       |
|----------------------|-------------------|---------------|-----------------------------------------------------------------------|
| T <sub>2</sub>       | 492,56761         | -             | HOMO->L+1 (56%)<br>H-1->LUMO (41%), HOMO->LUMO (33%), HOMO->L+1 (12%) |
| T <sub>3</sub>       | 442,895596        | -             | H-1->LUMO (32%), HOMO->LUMO (41%)                                     |
| <b>S<sub>1</sub></b> | <b>435,36833</b>  | <b>0,0973</b> | <b>HOMO-&gt;LUMO (92%)</b>                                            |
| S <sub>2</sub>       | 425,828386        | 0,026         | HOMO->L+1 (93%)                                                       |
| S <sub>3</sub>       | 368,978611        | 0,0065        | H-1->LUMO (13%), H-1->L+1 (73%)                                       |
| <b>S<sub>4</sub></b> | <b>367,447671</b> | <b>0,078</b>  | <b>H-1-&gt;LUMO (77%), H-1-&gt;L+1 (13%)</b>                          |
| S <sub>5</sub>       | 347,401701        | 0,0014        | H-2->LUMO (84%)                                                       |
| S <sub>6</sub>       | 340,382136        | 0,0014        | HOMO->L+2 (88%)                                                       |
| S <sub>7</sub>       | 336,849493        | 0,0266        | H-3->LUMO (80%)                                                       |

**Table S6.** Composition (%) of Frontier MOs in terms of ligands and metals in the ground state in CH<sub>2</sub>Cl<sub>2</sub> for **1**, **2a**, **2b**, **2c** and **3a**.

|        |       | <b>1</b>  |     |                  |    |
|--------|-------|-----------|-----|------------------|----|
| MO     | eV    | Pt        | pbt | DMSO             | Cl |
| LUMO+5 | 0.03  | 1         | 99  | 1                | 0  |
| LUMO+4 | -0.07 | 6         | 90  | 4                | 0  |
| LUMO+3 | -0.43 | 2         | 97  | 1                | 0  |
| LUMO+2 | -0.51 | 25        | 67  | 7                | 1  |
| LUMO+1 | -1.36 | 47        | 31  | 17               | 5  |
| LUMO   | -2.15 | 6         | 93  | 1                | 0  |
| HOMO   | -6.03 | 27        | 65  | 0                | 7  |
| HOMO-1 | -6.47 | 22        | 68  | 1                | 10 |
| HOMO-2 | -6.64 | 74        | 23  | 3                | 1  |
| HOMO-3 | -6.68 | 18        | 78  | 1                | 3  |
| HOMO-4 | -7.03 | 15        | 12  | 4                | 69 |
| HOMO-5 | -7.33 | 10        | 42  | 2                | 46 |
|        |       | <b>2a</b> |     |                  |    |
| MO     | eV    | Pt        | pbt | P <sup>^</sup> O |    |
| LUMO+5 | -0,49 | 10        | 19  | 70               |    |
| LUMO+4 | -0,74 | 8         | 5   | 88               |    |
| LUMO+3 | -0,96 | 1         | 1   | 98               |    |
| LUMO+2 | -1,09 | 7         | 6   | 87               |    |
| LUMO+1 | -1,4  | 10        | 9   | 81               |    |
| LUMO   | -2    | 5         | 91  | 4                |    |
| HOMO   | -5,87 | 31        | 63  | 6                |    |
| HOMO-1 | -6,33 | 44        | 41  | 15               |    |
| HOMO-2 | -6,39 | 53        | 32  | 15               |    |
| HOMO-3 | -6,57 | 9         | 75  | 16               |    |
| HOMO-4 | -6,64 | 4         | 29  | 66               |    |
| HOMO-5 | -6,81 | 24        | 7   | 69               |    |
|        |       | <b>2b</b> |     |                  |    |
| MO     | eV    | Pt        | pbt | P <sup>^</sup> O |    |
| LUMO+5 | -0,56 | 11        | 28  | 61               |    |
| LUMO+4 | -0,8  | 5         | 3   | 92               |    |
| LUMO+3 | -1,08 | 6         | 3   | 91               |    |
| LUMO+2 | -1,15 | 12        | 10  | 77               |    |
| LUMO+1 | -1,38 | 10        | 8   | 82               |    |
| LUMO   | -2,08 | 5         | 92  | 3                |    |
| HOMO   | -6,01 | 28        | 69  | 3                |    |
| HOMO-1 | -6,47 | 84        | 4   | 12               |    |
| HOMO-2 | -6,5  | 19        | 76  | 4                |    |
| HOMO-3 | -6,64 | 8         | 91  | 1                |    |
| HOMO-4 | -7,04 | 7         | 6   | 87               |    |
| HOMO-5 | -7,12 | 1         | 1   | 98               |    |

| <b>2c</b> |       |    |     |                  |  |
|-----------|-------|----|-----|------------------|--|
| MO        | eV    | Pt | pbt | P <sup>^</sup> O |  |
| LUMO+5    | -0,33 | 7  | 76  | 17               |  |
| LUMO+4    | -0,51 | 4  | 7   | 89               |  |
| LUMO+3    | -0,59 | 15 | 26  | 58               |  |
| LUMO+2    | -0,96 | 11 | 8   | 81               |  |
| LUMO+1    | -1,11 | 6  | 5   | 89               |  |
| LUMO      | -1,99 | 5  | 93  | 2                |  |
| HOMO      | -5,83 | 32 | 55  | 13               |  |
| HOMO-1    | -6,3  | 6  | 40  | 53               |  |
| HOMO-2    | -6,41 | 13 | 34  | 53               |  |
| HOMO-3    | -6,43 | 87 | 6   | 7                |  |
| HOMO-4    | -6,57 | 6  | 92  | 1                |  |
| HOMO-5    | -6,74 | 20 | 20  | 59               |  |

  

| <b>3a</b> |       |    |        |        |                  |
|-----------|-------|----|--------|--------|------------------|
| MO        | eV    | Ir | pbt(1) | pbt(2) | P <sup>^</sup> O |
| LUMO+5    | -0,52 | 2  | 3      | 21     | 75               |
| LUMO+4    | -0,68 | 4  | 4      | 9      | 84               |
| LUMO+3    | -0,81 | 3  | 3      | 2      | 92               |
| LUMO+2    | -1,18 | 3  | 1      | 5      | 92               |
| LUMO+1    | -1,86 | 3  | 90     | 5      | 2                |
| LUMO      | -1,9  | 3  | 5      | 91     | 2                |
| HOMO      | -5,46 | 38 | 35     | 19     | 8                |
| HOMO-1    | -5,93 | 30 | 17     | 44     | 9                |
| HOMO-2    | -6,12 | 19 | 52     | 10     | 20               |
| HOMO-3    | -6,26 | 9  | 15     | 20     | 56               |
| HOMO-4    | -6,4  | 15 | 7      | 56     | 23               |
| HOMO-5    | -6,45 | 20 | 53     | 16     | 11               |

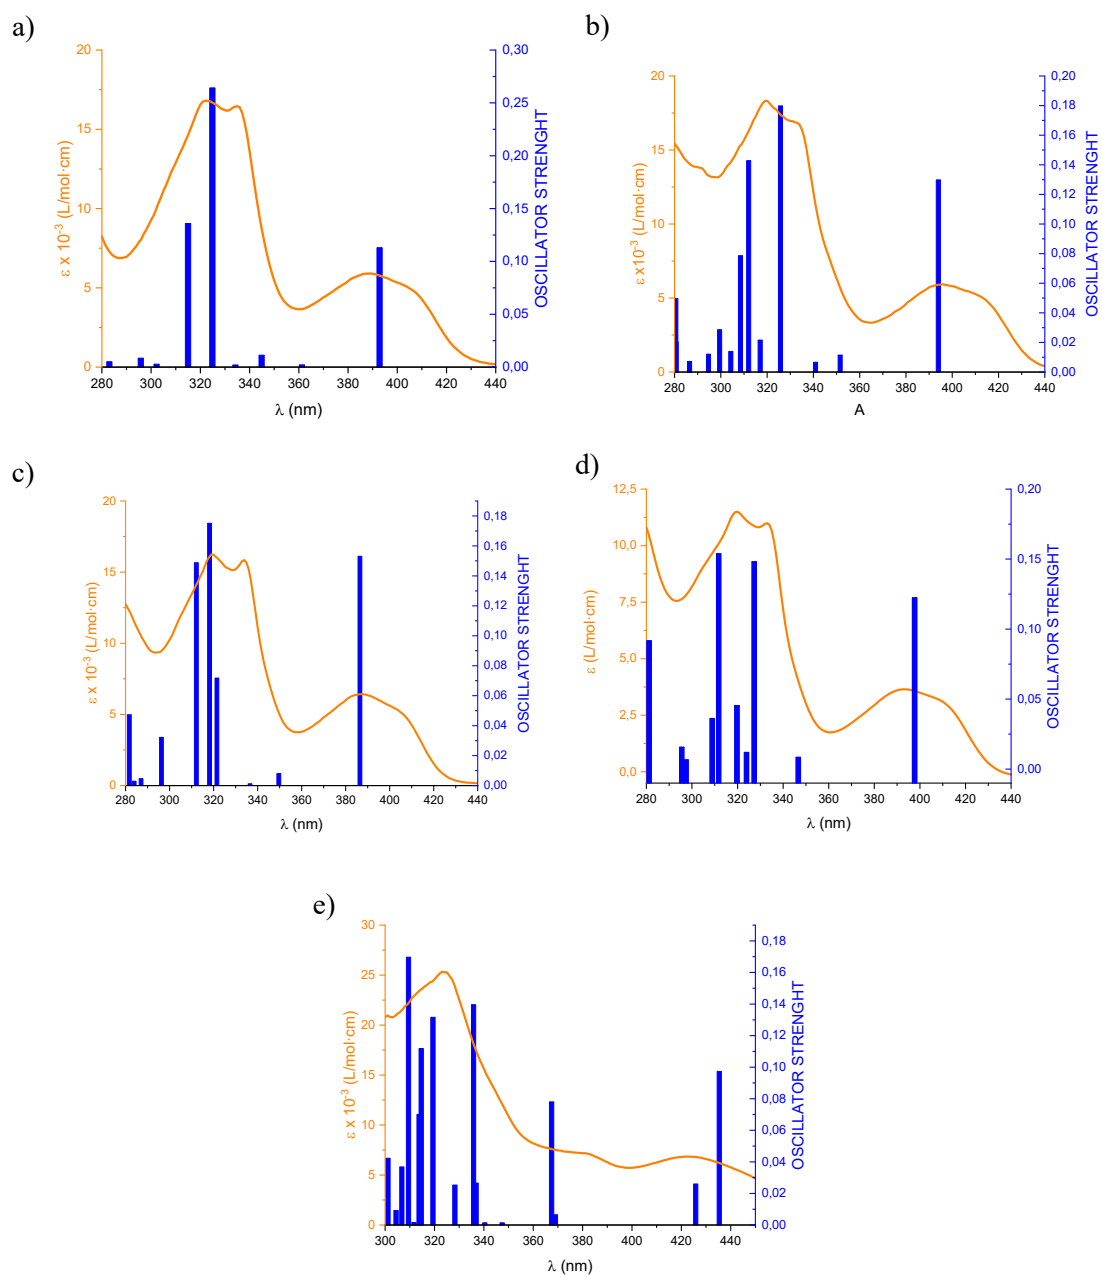

**Fig. S12** Calculated stick absorption spectra of a) **1**, b) **2a**, c) **2b**, d) **2c** and d) **3a** in CH<sub>2</sub>Cl<sub>2</sub> compared with the experimental spectra.

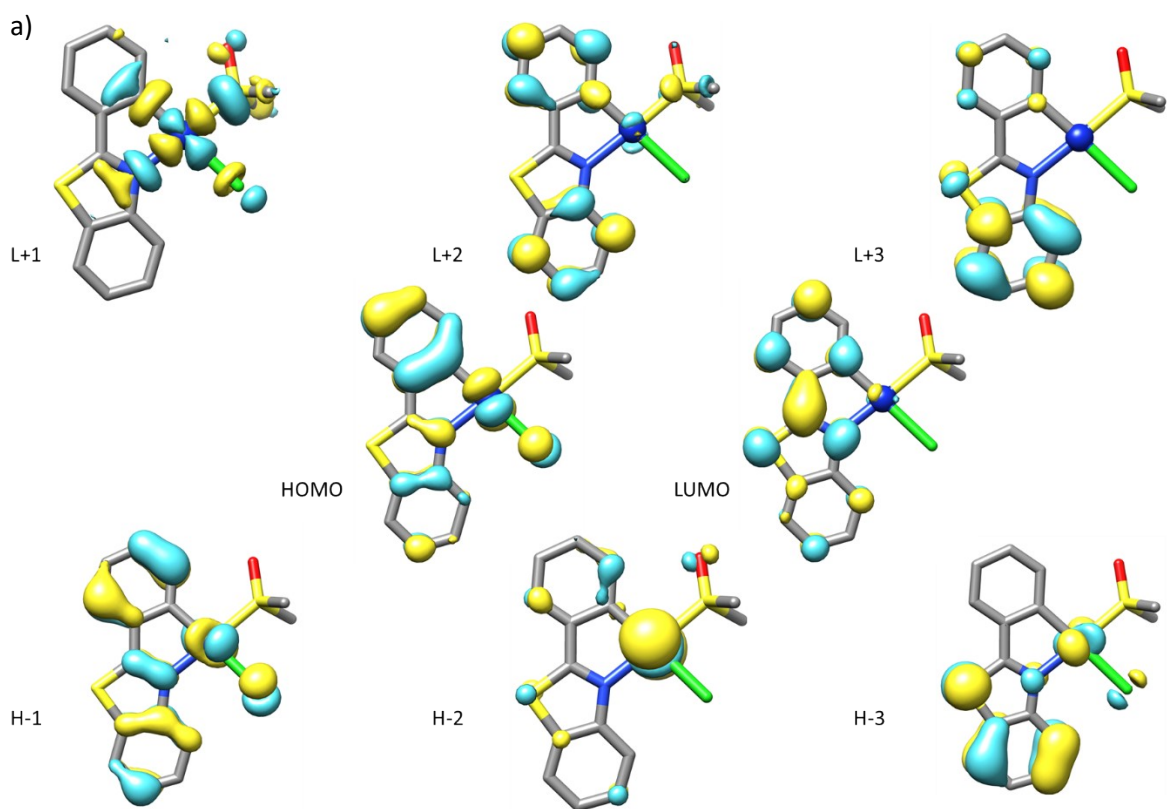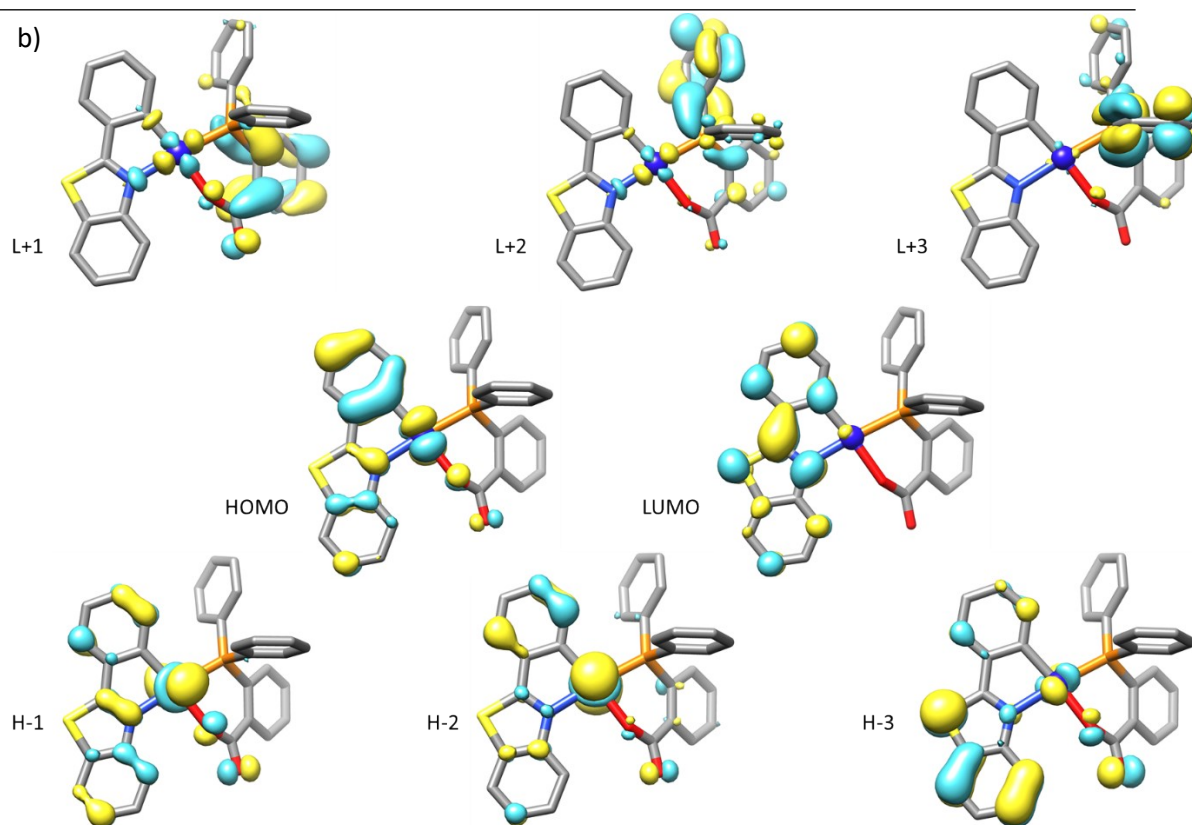

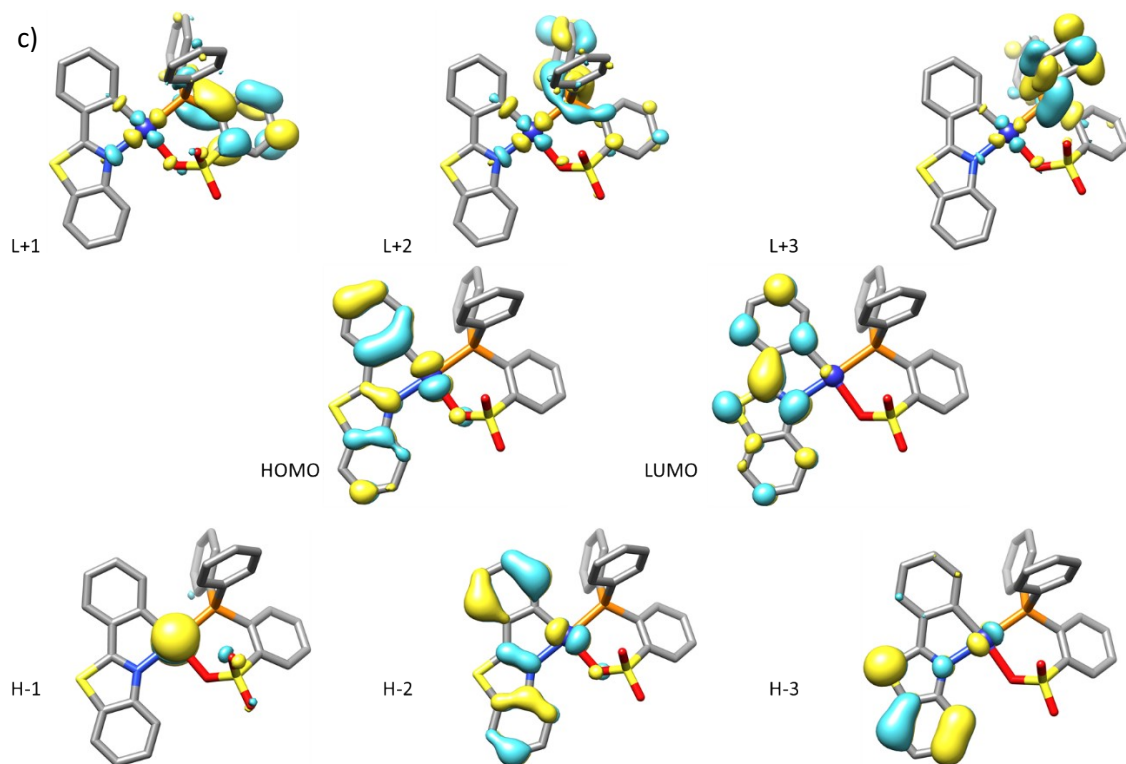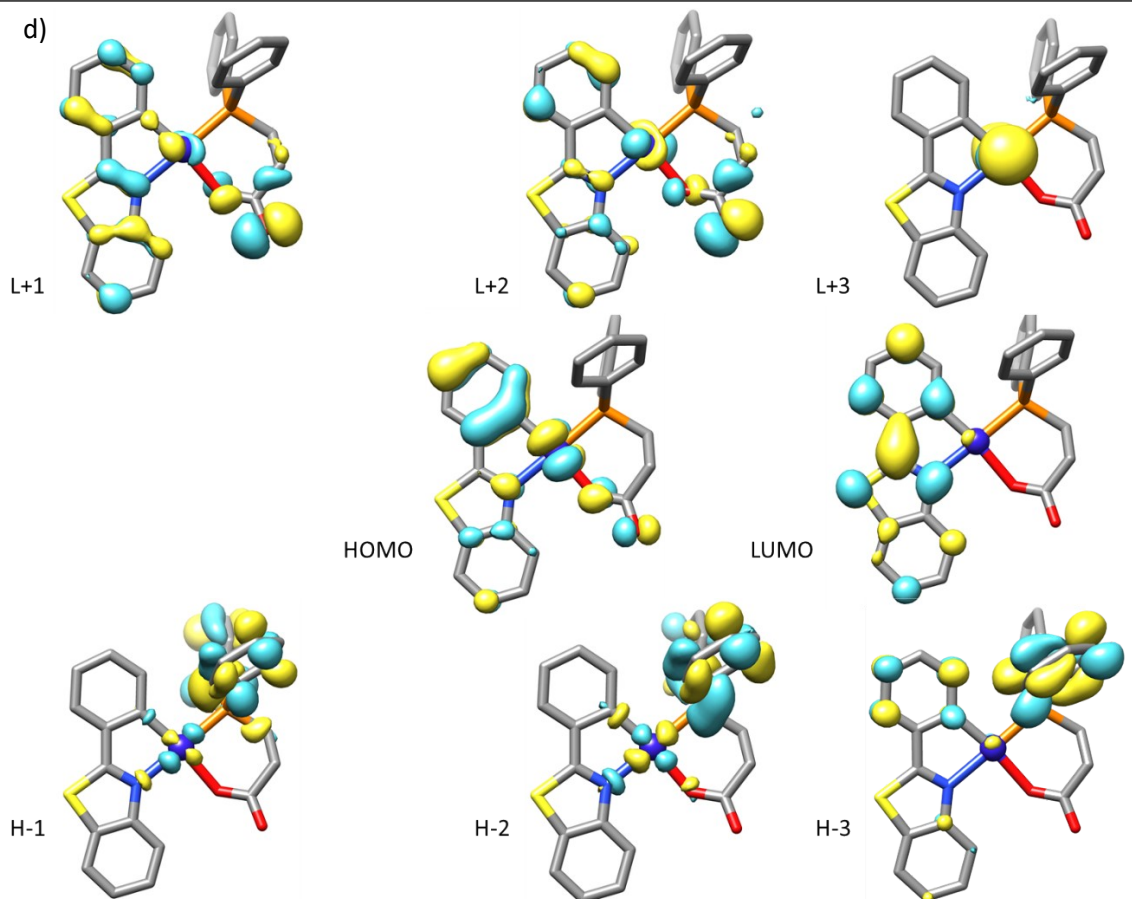

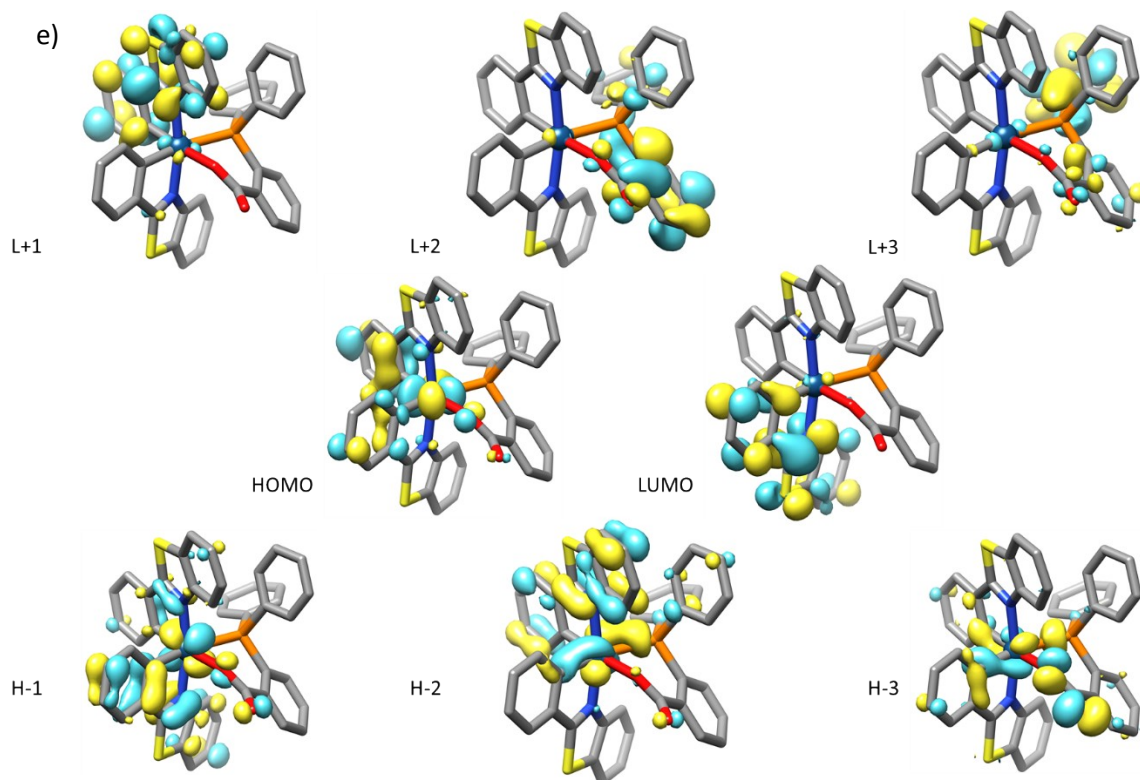

**Fig. S13** Selected frontier Molecular Orbitals for a) **1**, b) **2a**, c) **2b**, d) **2c** and d) **3a** in the ground state.

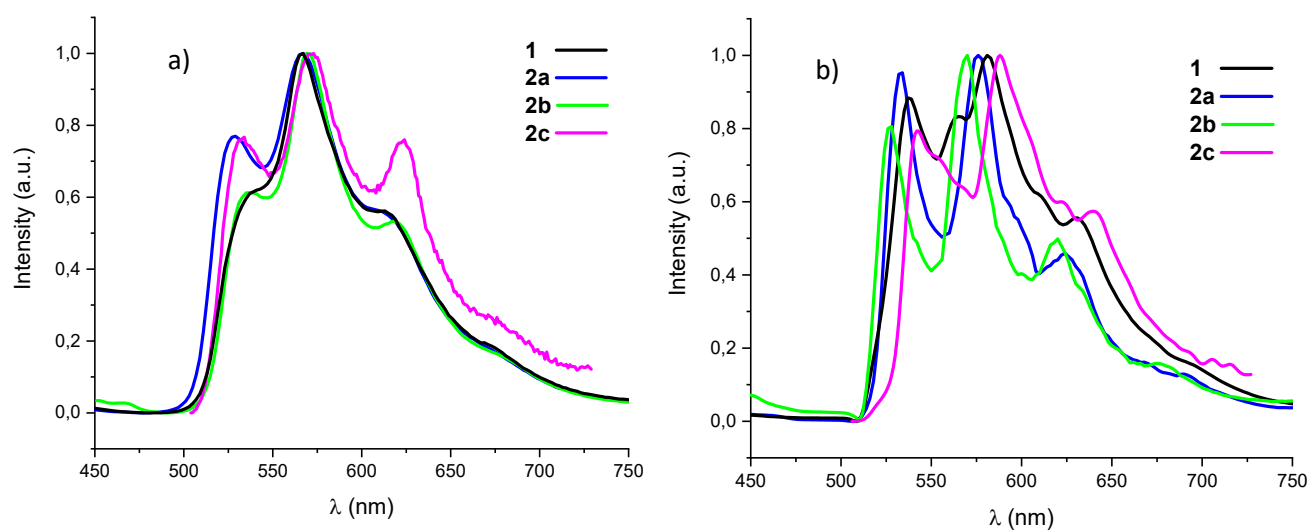

**Fig. S14** Emission spectra of platinum complexes in solid state a) at 298 K, b) 77 K ( $\lambda_{exc}$  400-420 nm).



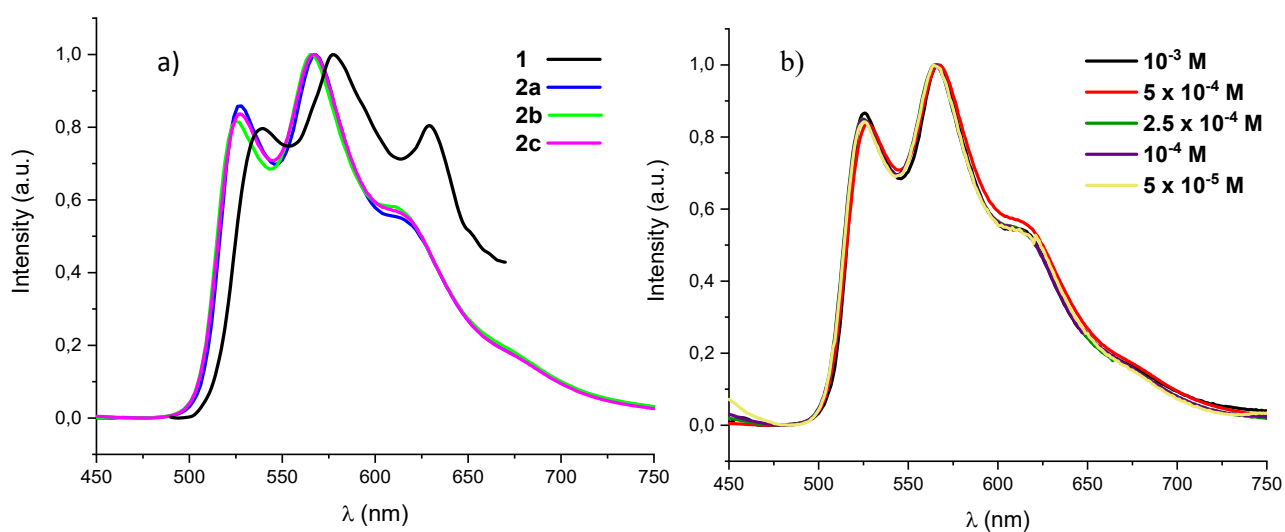

c)

**Fig. S15**  
 platinum  
 degassed  
 a) at 298 K  
 b) of **2c** at  
 298 K, c)  
 emission  
 degassed  
 solution at

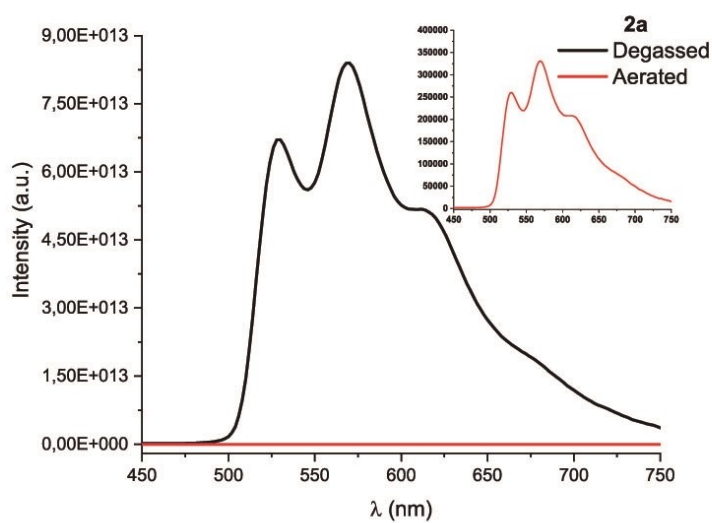

Emission spectra of  
 complexes in  
 $\text{CH}_2\text{Cl}_2$   $5 \times 10^{-4}$  M  
 $(\lambda_{\text{exc}} 400\text{-}420 \text{ nm})$ ,  
 several  
 concentrations at  
 Comparison of the  
 spectra of **2a** in  
 and aerated  $\text{CH}_2\text{Cl}_2$   
 298 K.

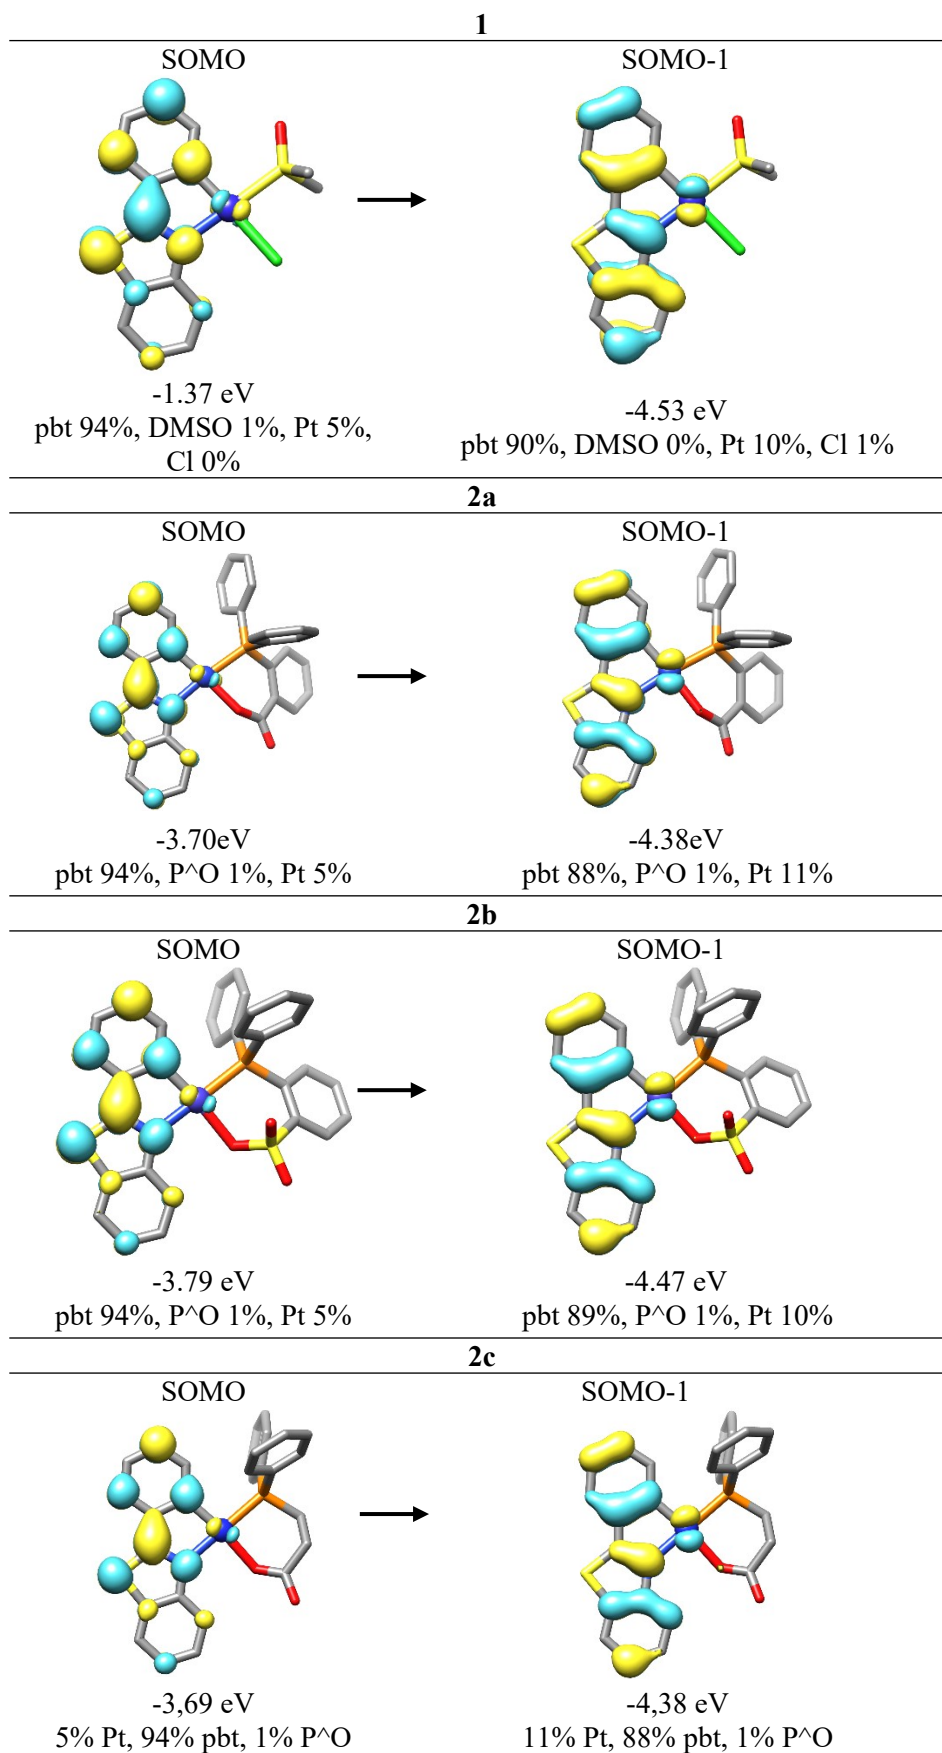

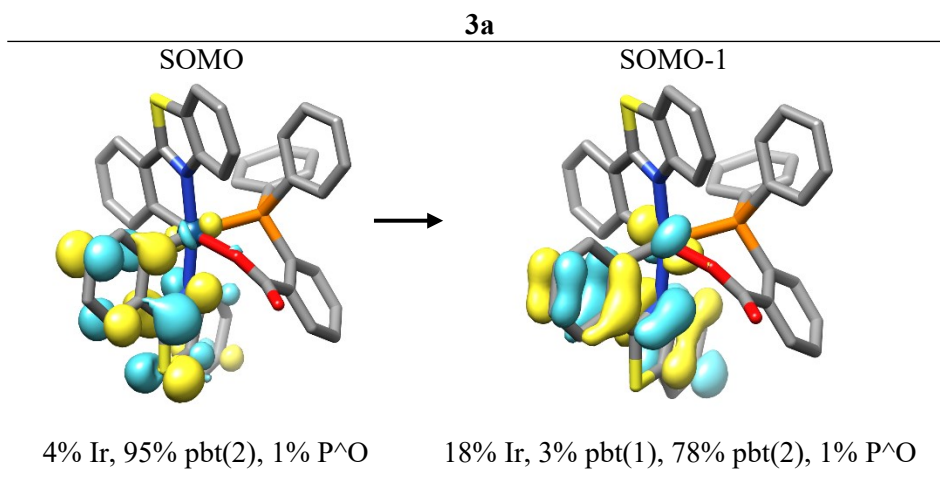

**Fig. S16** Plots and composition (%) of the frontier MOs in CH<sub>2</sub>Cl<sub>2</sub> of **1**, **2a**, **2b**, **2c** and **3a**

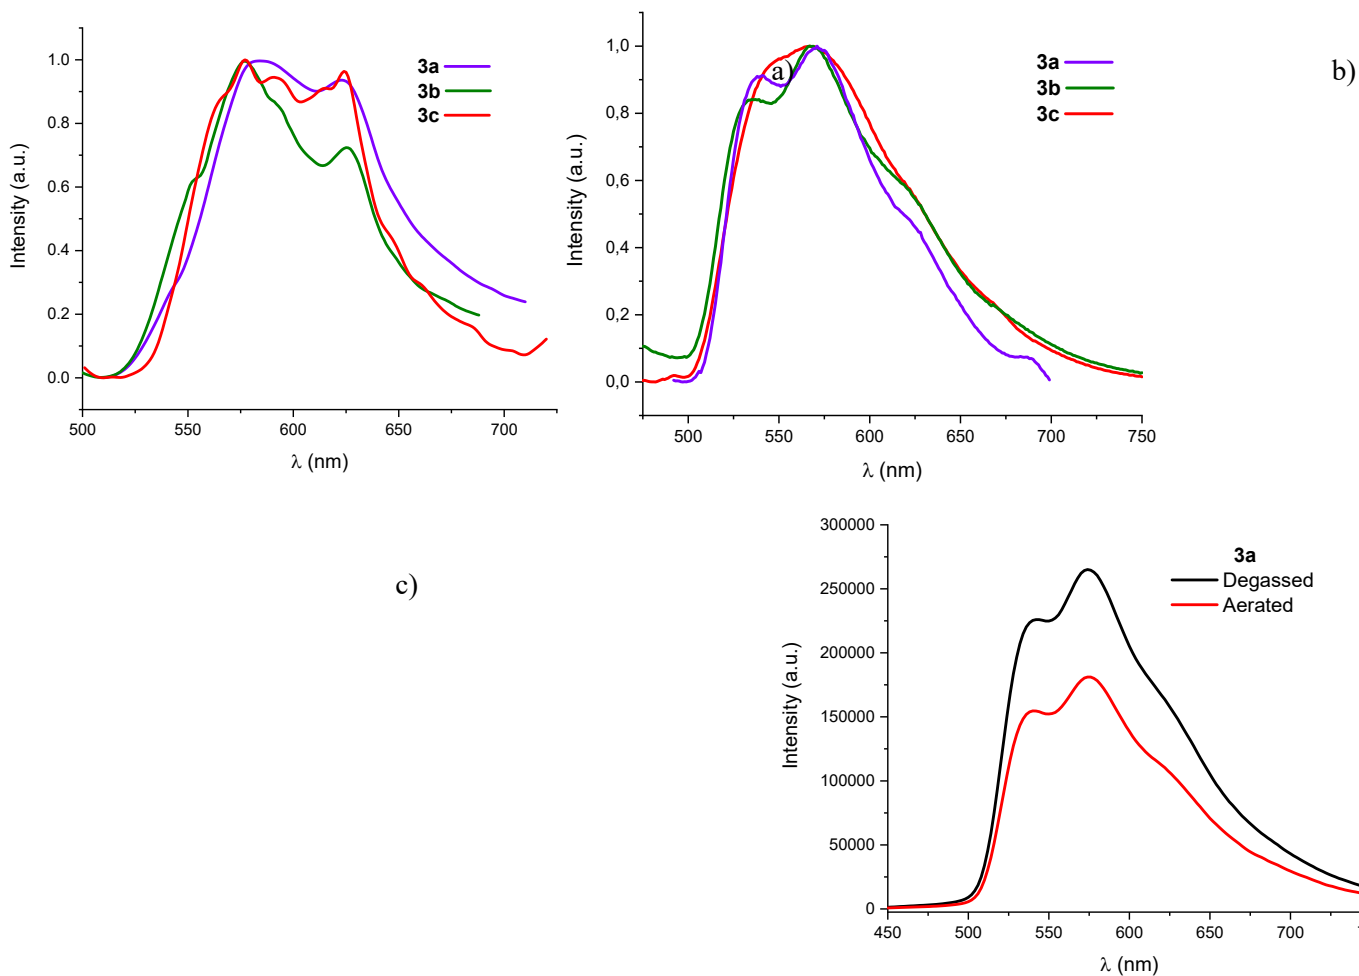

**Fig. S17** Emission spectra of iridium complexes a) in solid state at 298 K, b) in degassed  $\text{CH}_2\text{Cl}_2$   $5 \times 10^{-4}$  M ( $\lambda_{\text{exc}}$  400-420 nm), c) Comparison of the emission spectra of **3a** in degassed and aerated  $\text{CH}_2\text{Cl}_2$  solution at 298 K.

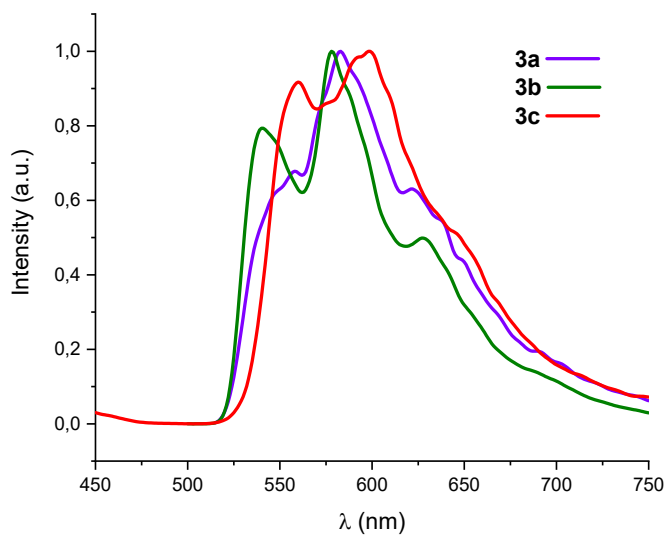

**Fig. S18** Emission spectra of iridium complexes in solid state at 77 K.
